# Supplementary material for: Clustering of strong replicators associated with active promoters is sufficient to establish an early‐replicating domain
Source: PubMed Central journal article supplement — EMBO J. 2020 Sep 16;39(21):e99520. doi: 10.15252/embj.201899520 (PMC7604622; doi:10.15252/embj.201899520), 2020-09-16
Supplement: EMBJ-39-e99520-s001.pdf [file EMBJ-39-e99520-s001.pdf]

## APPENDIX

### **Clustering of strong replicators associated with active promoter are sufficient to establish an early-replicating domain**

Caroline Brossas<sup>1</sup>, Anne-Laure Valton<sup>2,5</sup>, Sergey V. Venev<sup>2</sup>, Sabarinadh Chilaka<sup>3</sup>, Antonin Counillon<sup>1</sup>, Marc Laurent<sup>1</sup>, Coralie Goncalves<sup>1</sup>, Bénédicte Duriez<sup>1</sup>, Franck Picard<sup>4</sup>, Job Dekker<sup>2,5</sup> and Marie-Noëlle Prioleau<sup>1\*</sup>

Page 2-10: Appendix Figures S1-S9

Page 11-15: Appendix Table S1-S5

Page 16-21: Appendix Figure legends S1-S9

Page 21-22: Appendix Table legends S1-S5

Page 22: References

**A**

1) Asynchronous cells are BrdU pulse labelled for 1h

2) S-phase cells are sorted by flow cytometry into 4 fractions (S1 to S4)

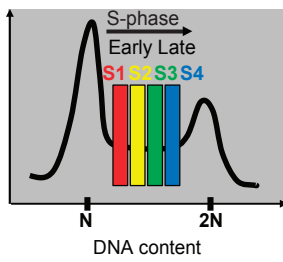

3) The nascent BrdU-labelled DNA is enriched by immunoprecipitation

4) and quantified with allele specific primer pairs by qPCR analysis

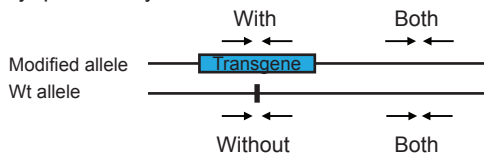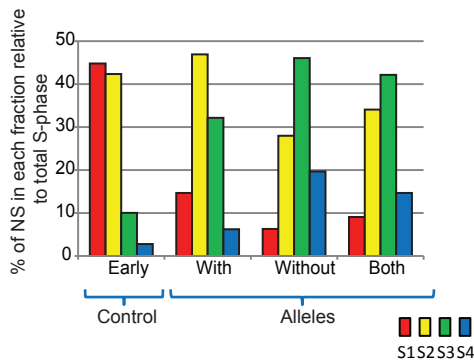

**B**

Method 1:

Proportion differences between early fractions and late fractions

$$\begin{cases} \Delta L = -27.3\% \\ \Delta E = +8.4\% \\ -\Delta L + \Delta E = 35.7\% \end{cases}$$

$$\Delta L = [(\%S3 + \%S4)_{with}] - [(\%S3 + \%S4)_{without}]$$

$$\Delta E = [(\%S1)_{with}] - [(\%S1)_{without}]$$

Global timing shift value:  $-\Delta L + \Delta E$

**C**

Method 2:

Slope differences ( $\Delta$ slope) on four fractions between the modified and the Wt allele

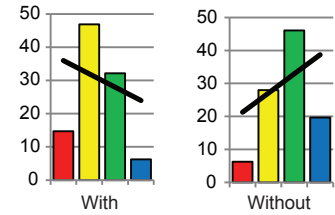

Linear regression equations:

$$y = -4.0066x + 35.016 \quad y = 5.8147x + 10.463$$

$$\Delta \text{slope} = -9.8$$

$$\Delta \text{slope} = \text{slope}_{with} - \text{slope}_{without}$$

**D**

Correlation between the slope differences ( $\Delta$ slope) and the global timing shift value ( $-\Delta L + \Delta E$ )

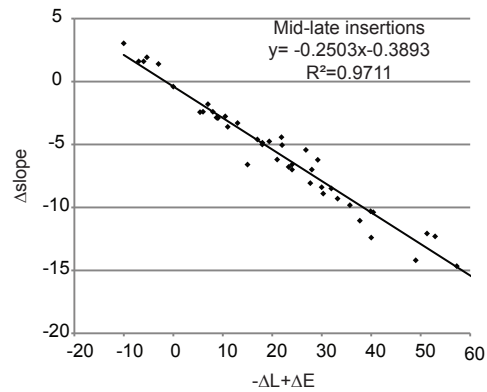

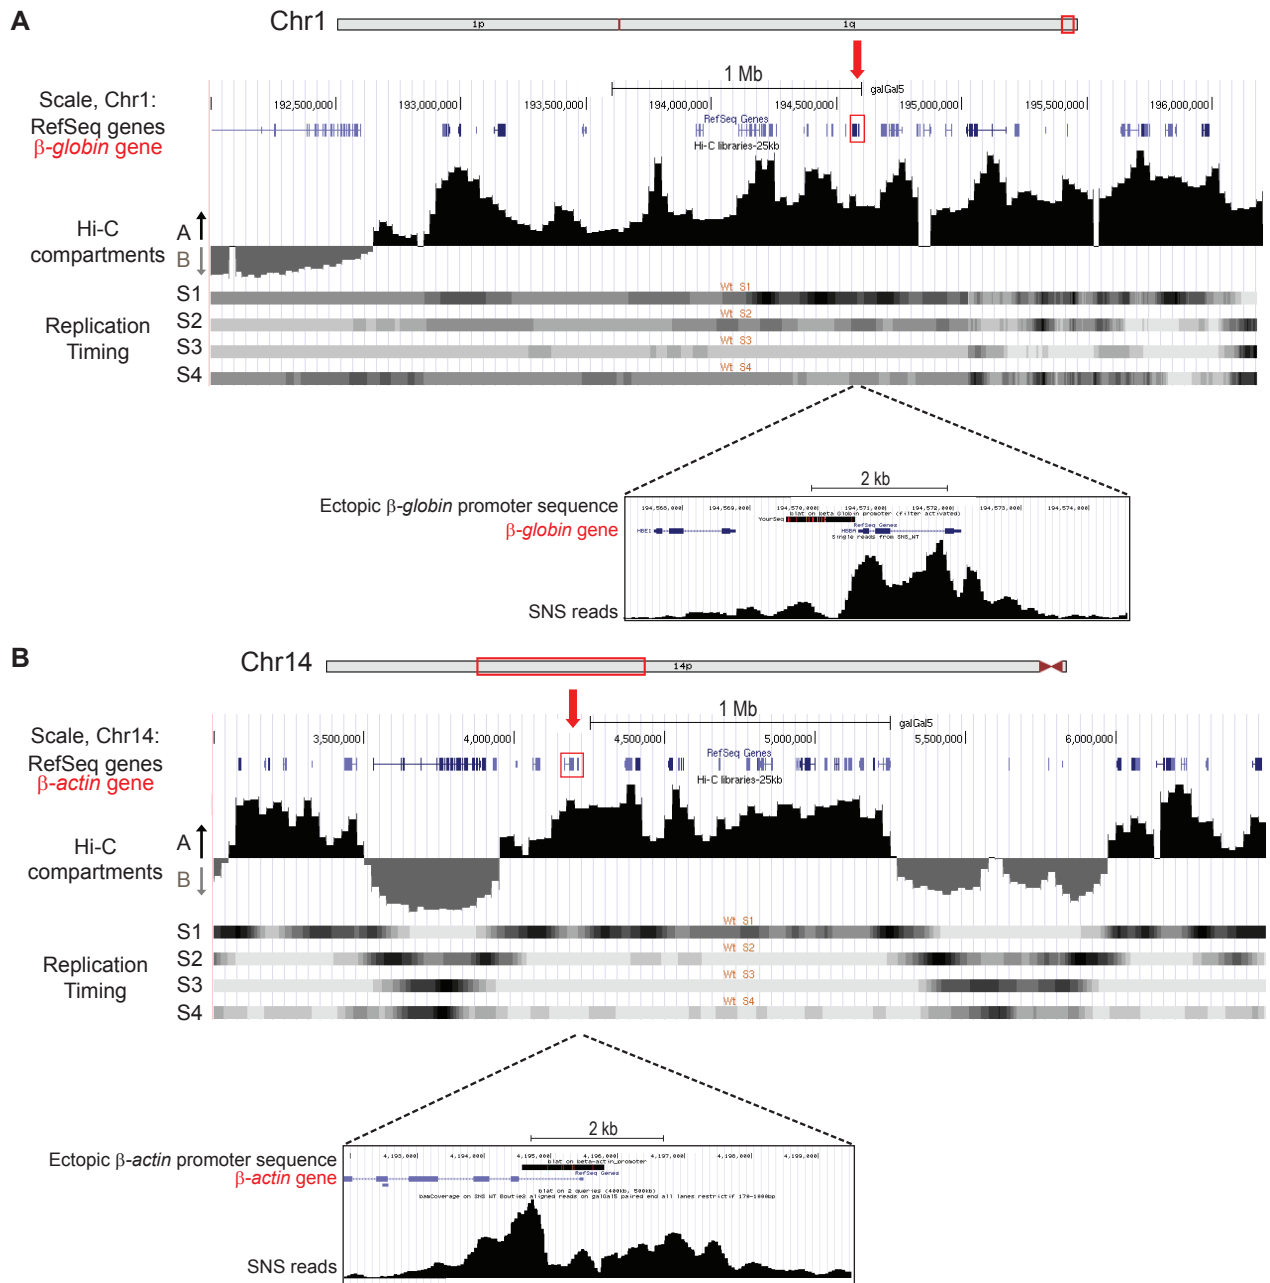

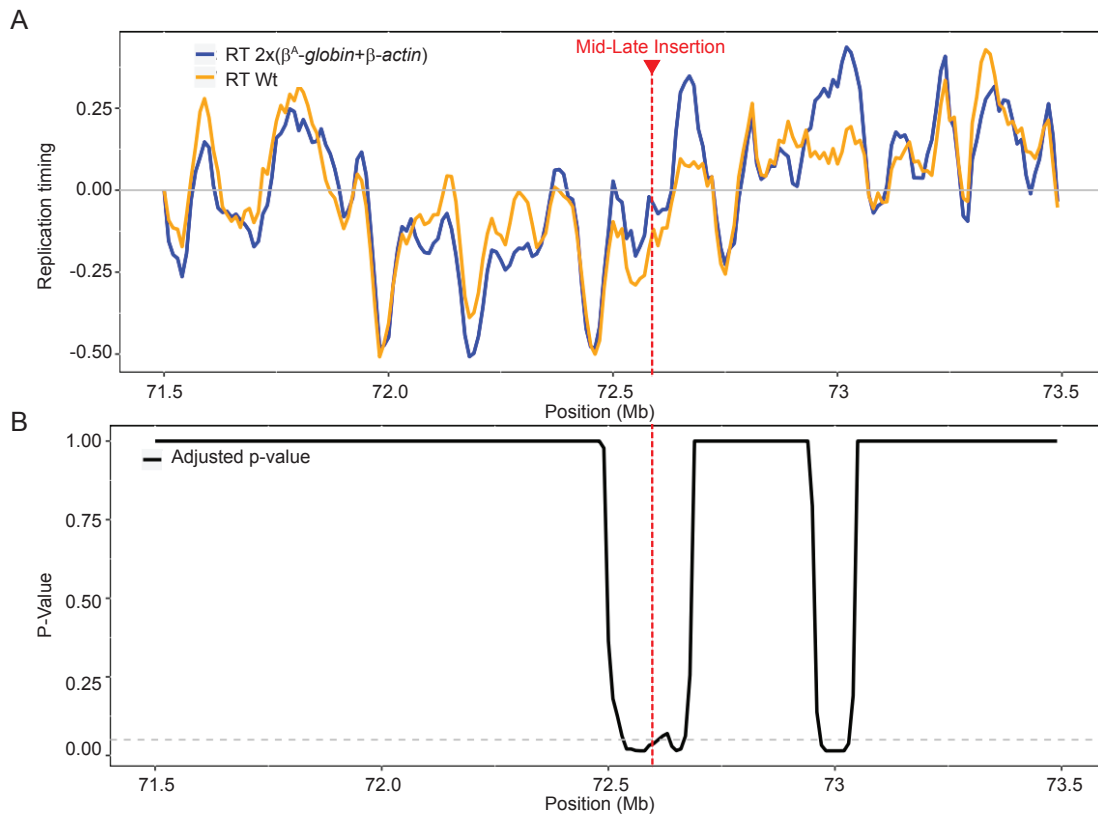



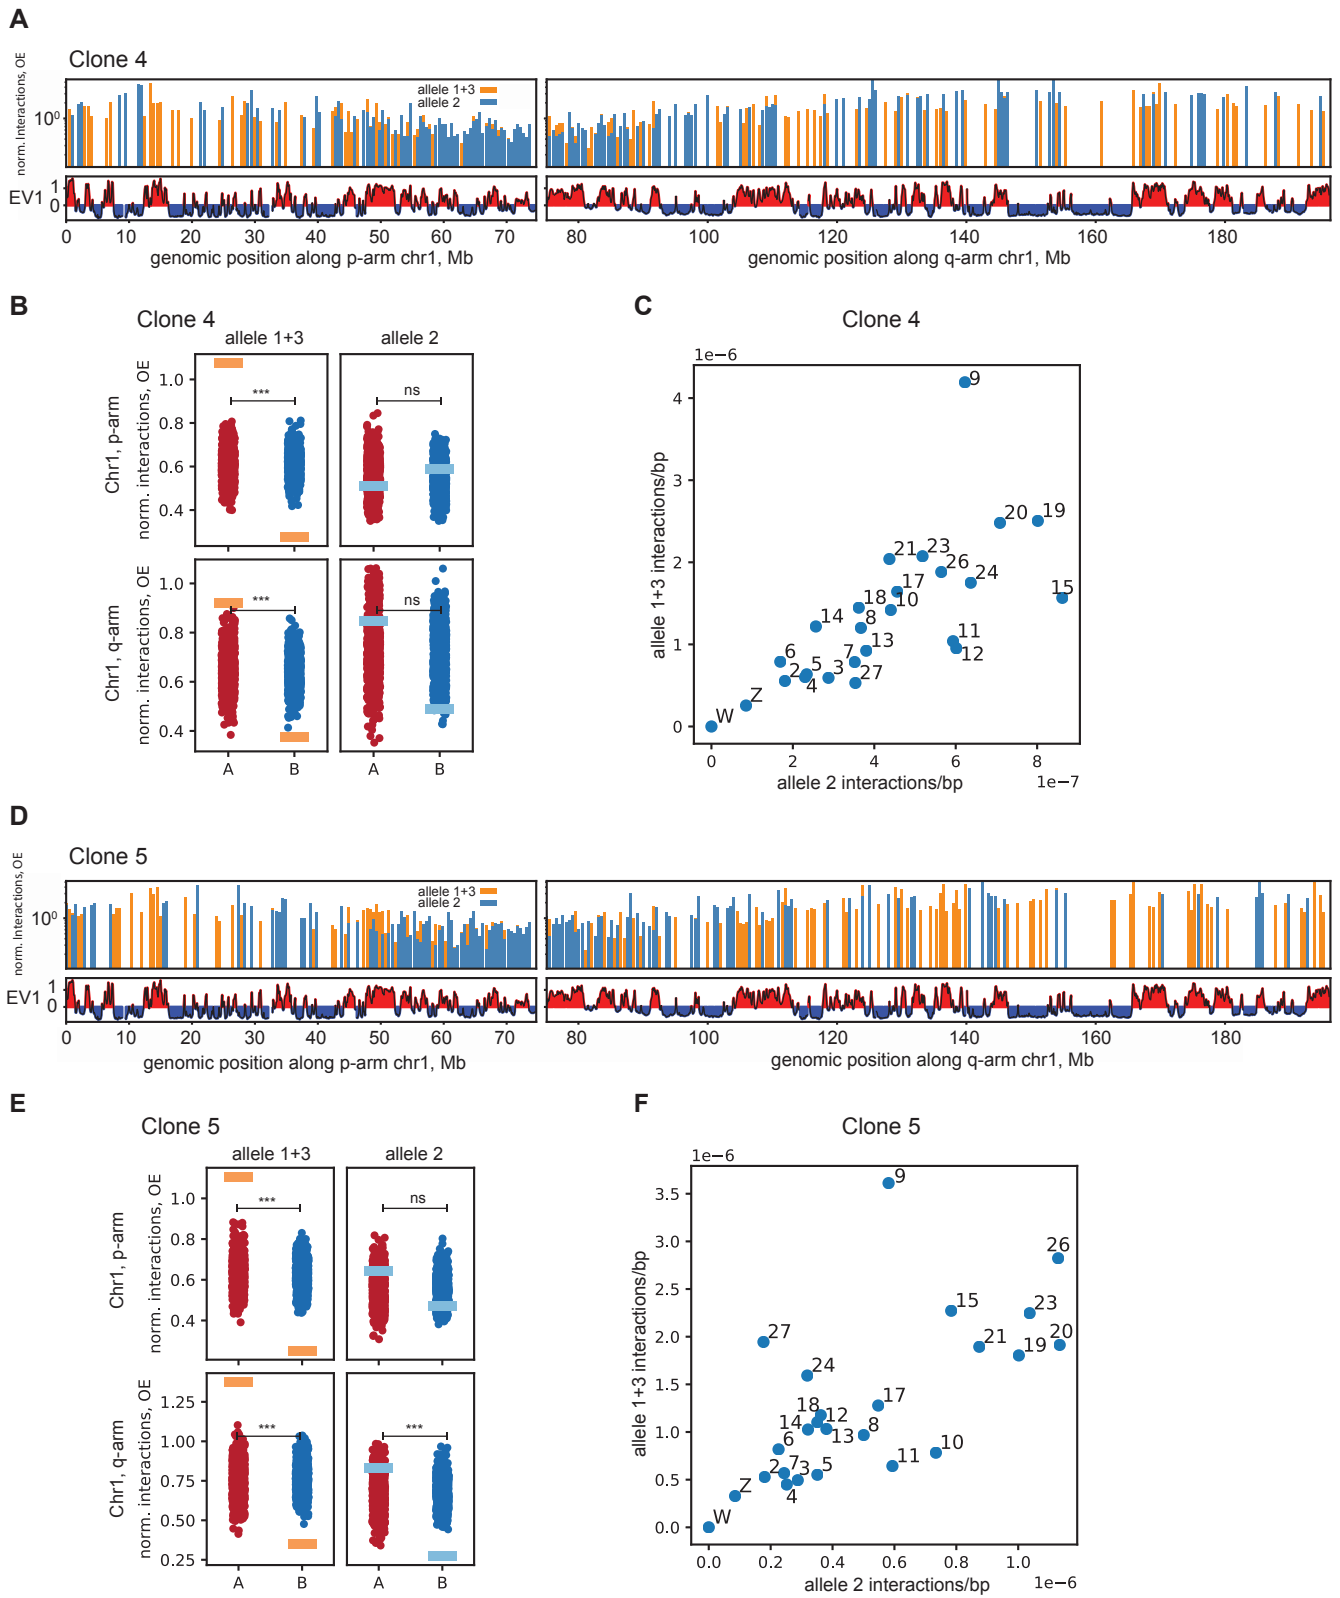



**A**

Large 1+3 and *loxP\_LE* (1)+ $\beta^A$ -globin+ $\beta$ -actin (3) excision

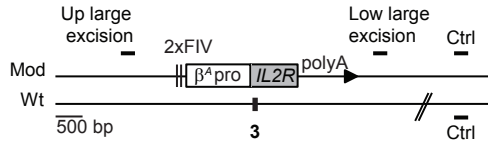

**Large excision Up/Low**

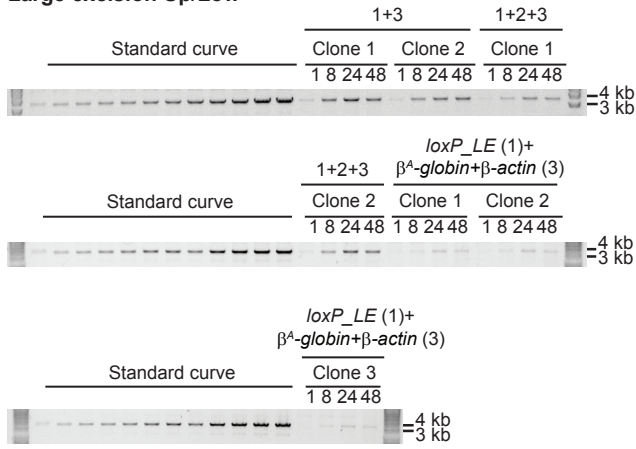

**Ctrl**

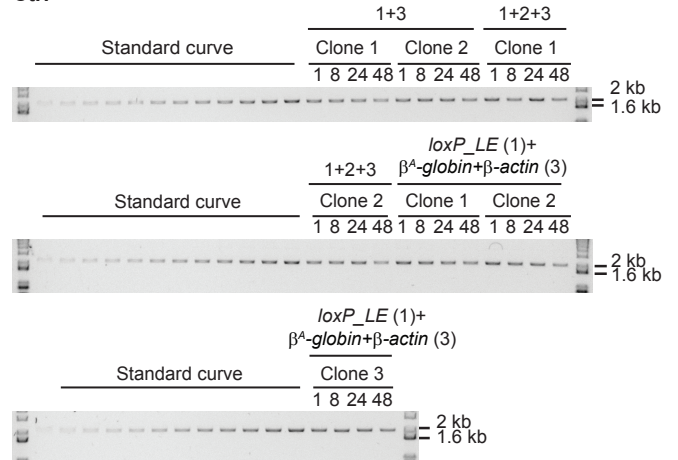

**B**

Large  $\beta$ -actin (1+3) excision

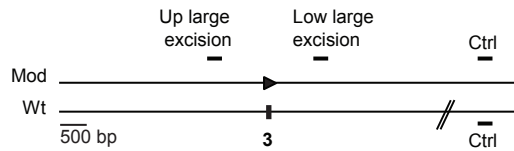

**Large excision Up/Low**

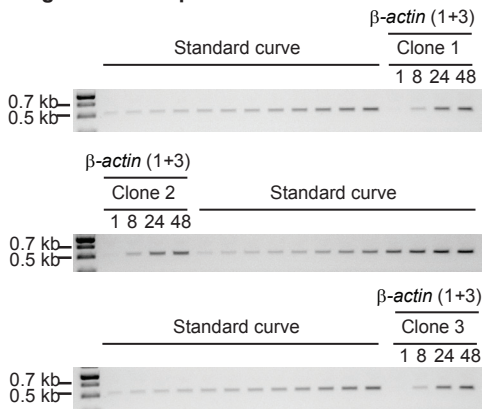

**Ctrl**

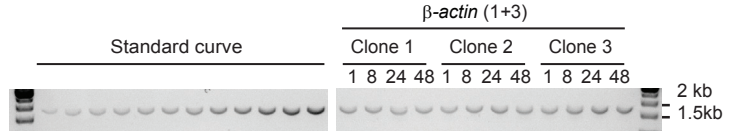

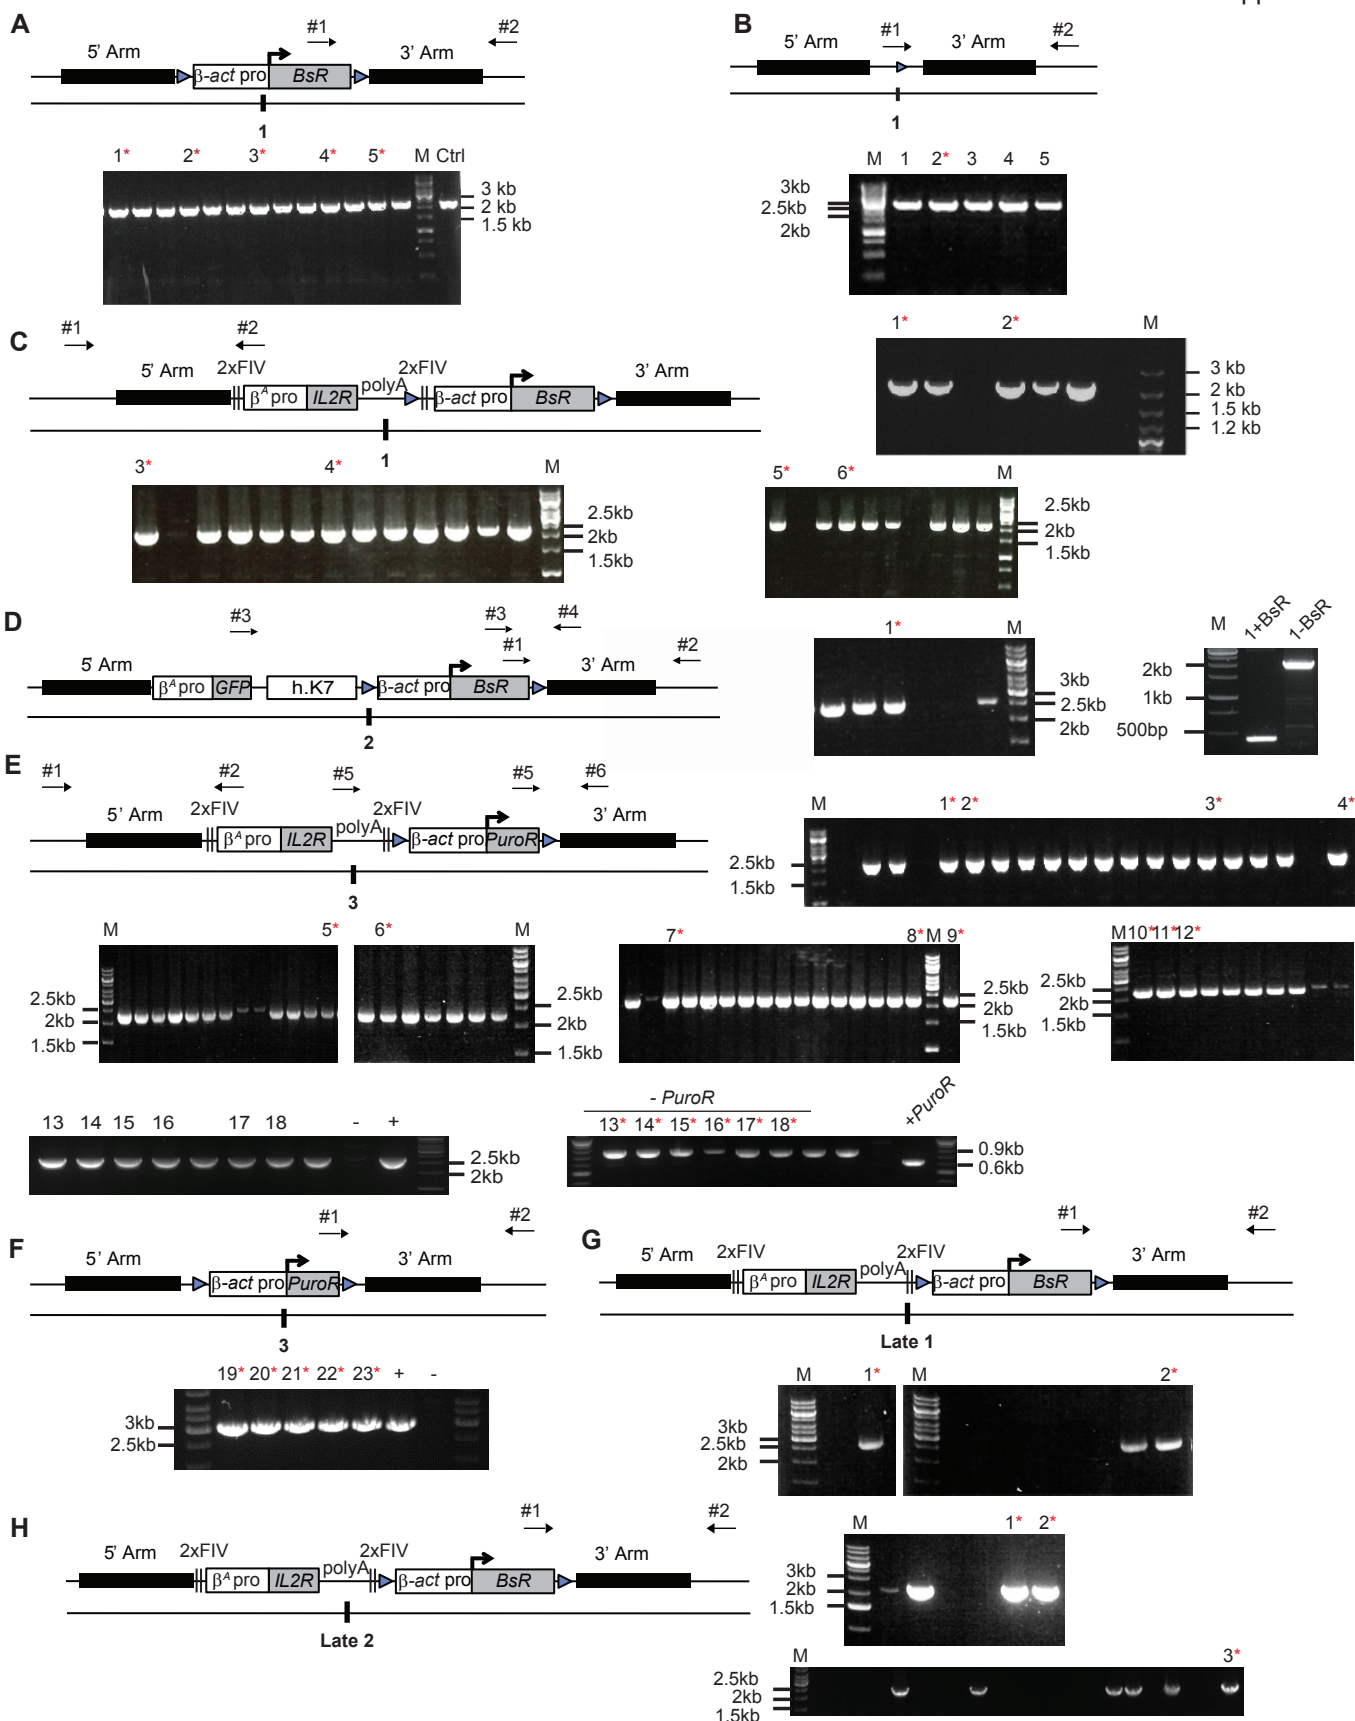

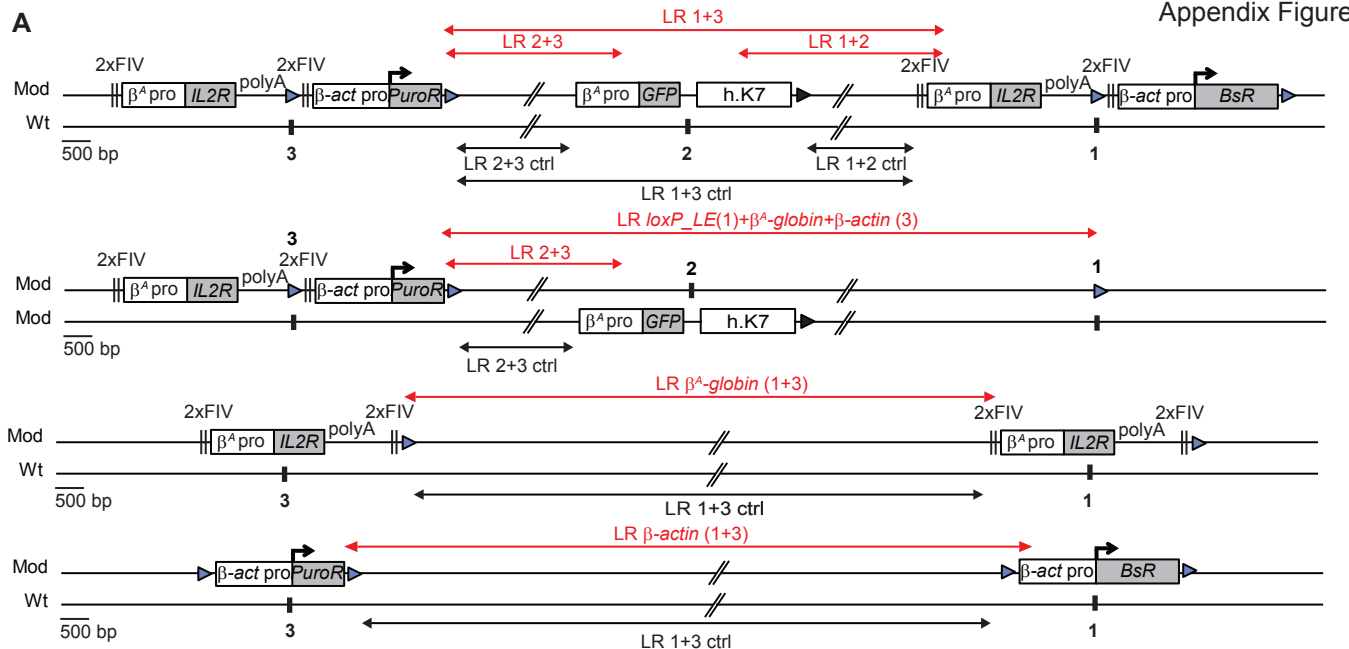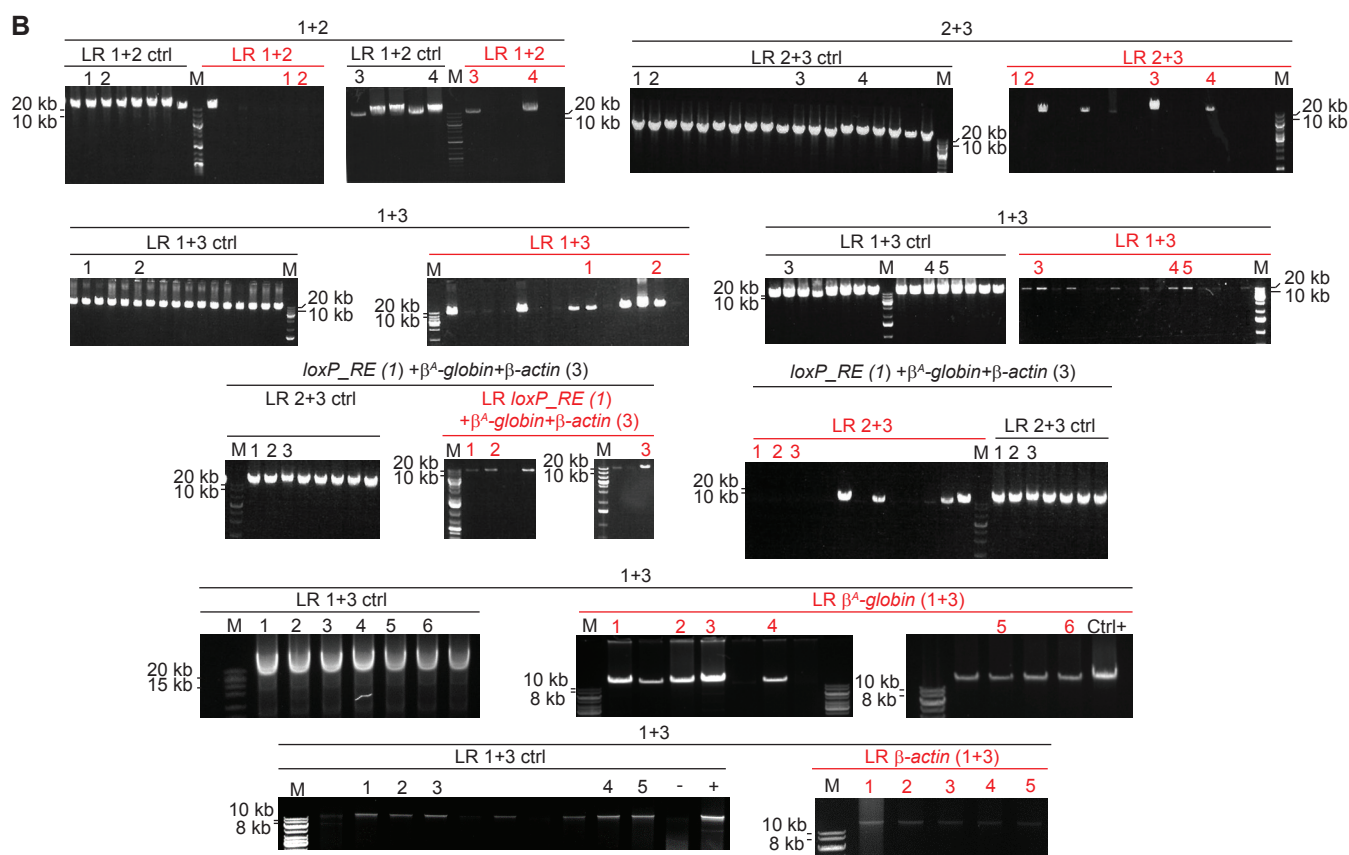

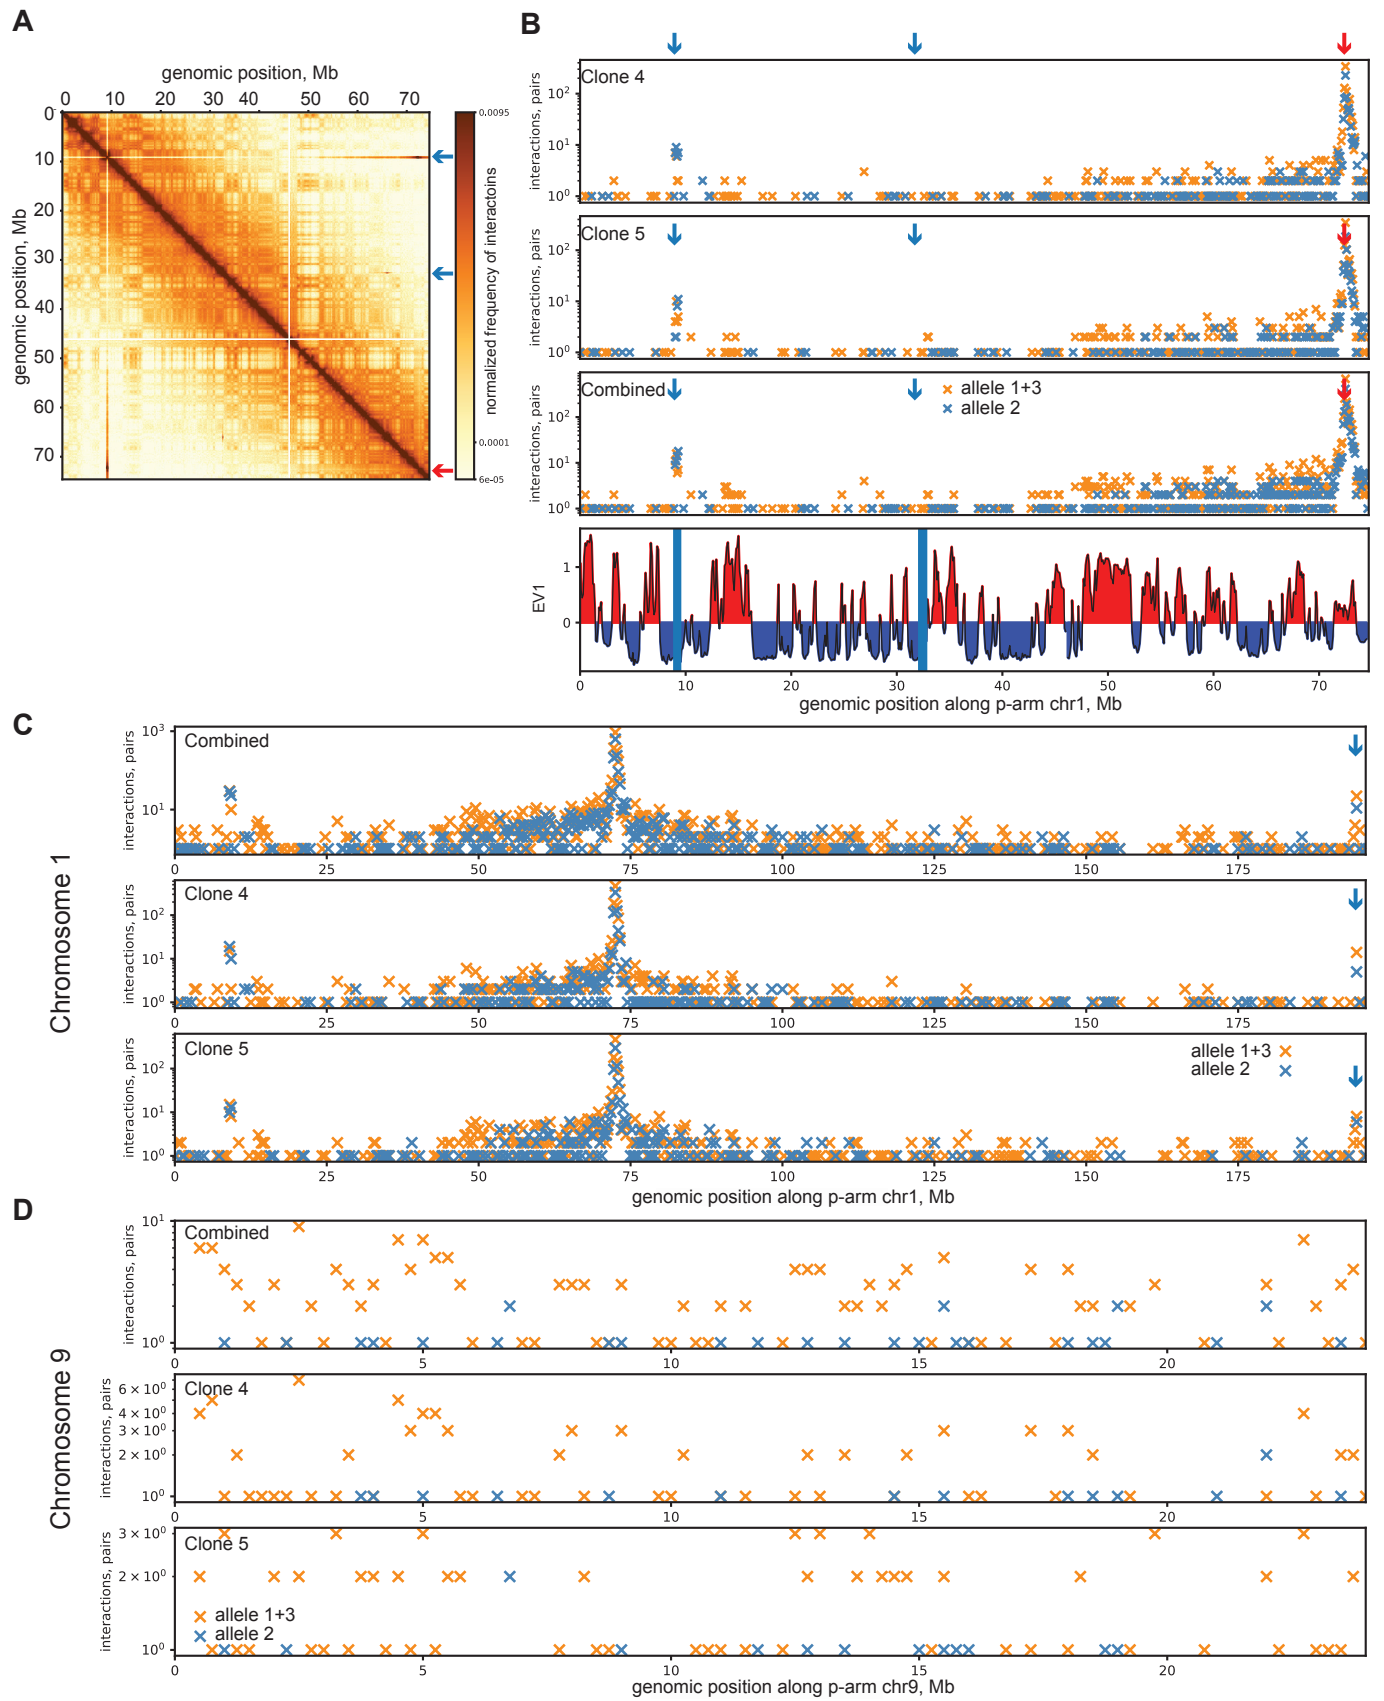

Appendix Table S1

| Site of insertion                                                                                                                                                                                                                                                                                                                                                                                                                                                            | Number of clones and source                                                            | RT shift Median values                     |
|------------------------------------------------------------------------------------------------------------------------------------------------------------------------------------------------------------------------------------------------------------------------------------------------------------------------------------------------------------------------------------------------------------------------------------------------------------------------------|----------------------------------------------------------------------------------------|--------------------------------------------|
| <b>Mid-Late (1)</b>                                                                                                                                                                                                                                                                                                                                                                                                                                                          | Total= 44                                                                              |                                            |
| <p>Mod <math>\xrightarrow{2x FIV}</math> <math>\beta^A</math> pro <math>\xrightarrow{IL2R}</math> polyA <math>\xrightarrow{2x FIV}</math></p> <p>Wt <math>\xrightarrow{1}</math></p>                                                                                                                                                                                                                                                                                         | 10 {<br>2 Hassan-Zadeh et al. 2012 (Figure 8)<br>8 Valton et al. 2014 (Figure 8C, S10) | $-\Delta L + \Delta E = +6.5\%$            |
| <p>Mod <math>\xrightarrow{2x FIV}</math> <math>\beta^A</math> pro <math>\xrightarrow{IL2R}</math> polyA <math>\xrightarrow{2x FIV}</math></p> <p>Wt <math>\xrightarrow{1}</math></p>                                                                                                                                                                                                                                                                                         | 8 {<br>2 Hassan-Zadeh et al. 2012 (Figure 6B)<br>6 Valton et al. 2014 (Figure 8C, S9)  | $-\Delta L + \Delta E = +20.2\%$           |
| <p>Mod <math>\xrightarrow{\beta-act\ pro}</math> <math>\xrightarrow{BsR}</math></p> <p>Wt <math>\xrightarrow{1}</math></p>                                                                                                                                                                                                                                                                                                                                                   | 6 {<br>1 Hassan-Zadeh et al. 2012 (Figure 4A)<br>5 This study (Figure EV1A.)           | $-\Delta L + \Delta E = +19.6\%$           |
| <p>Mod <math>\xrightarrow{2x FIV}</math> <math>\beta^A</math> pro <math>\xrightarrow{IL2R}</math> polyA <math>\xrightarrow{2x FIV}</math> <math>\beta-act\ pro</math> <math>\xrightarrow{BsR}</math></p> <p>Wt <math>\xrightarrow{1}</math></p>                                                                                                                                                                                                                              | 8 {<br>2 Hassan-Zadeh et al. 2012 (Figure 6A)<br>6 This study (Figure EV1B., EV2B-C.)  | $-\Delta L + \Delta E = +36.6\%$           |
| <b>Mid-Late (3)</b>                                                                                                                                                                                                                                                                                                                                                                                                                                                          |                                                                                        |                                            |
| <p>Mod <math>\xrightarrow{2x FIV}</math> <math>\beta^A</math> pro <math>\xrightarrow{IL2R}</math> polyA <math>\xrightarrow{2x FIV}</math> <math>\beta-act\ pro</math> <math>\xrightarrow{PuroR}</math></p> <p>Wt <math>\xrightarrow{3}</math></p>                                                                                                                                                                                                                            | 3 {<br>This study (Figure EV2D-E.)                                                     | $-\Delta L + \Delta E = +26.8\%$           |
| <b>Mid-Late (1+3 and 1+2+3)</b>                                                                                                                                                                                                                                                                                                                                                                                                                                              |                                                                                        |                                            |
| <p>Mod <math>\xrightarrow{2x FIV}</math> <math>\beta^A</math> pro <math>\xrightarrow{IL2R}</math> polyA <math>\xrightarrow{2x FIV}</math> <math>\beta-act\ pro</math> <math>\xrightarrow{PuroR}</math> <math>\xrightarrow{2x FIV}</math> <math>\beta^A</math> pro <math>\xrightarrow{IL2R}</math> polyA <math>\xrightarrow{2x FIV}</math> <math>\beta-act\ pro</math> <math>\xrightarrow{BsR}</math></p> <p>Wt <math>\xrightarrow{3}</math> <math>\xrightarrow{1}</math></p> | 5 {<br>This study (Figure EV3A-B.)                                                     | $-\Delta L + \Delta E = +65.2\%$           |
| <p>Mod <math>\xrightarrow{\beta-act\ pro}</math> <math>\xrightarrow{PuroR}</math></p> <p>Wt <math>\xrightarrow{3}</math> <math>\xrightarrow{1}</math></p>                                                                                                                                                                                                                                                                                                                    | 5 {<br>This study (Figure EV3C.)                                                       | $-\Delta L + \Delta E = +38.5\%$           |
| <p>Mod <math>\xrightarrow{2x FIV}</math> <math>\beta^A</math> pro <math>\xrightarrow{IL2R}</math> polyA <math>\xrightarrow{2x FIV}</math> <math>\beta^A</math> pro <math>\xrightarrow{IL2R}</math> polyA <math>\xrightarrow{2x FIV}</math> <math>\beta^A</math> pro <math>\xrightarrow{IL2R}</math> polyA <math>\xrightarrow{2x FIV}</math></p> <p>Wt <math>\xrightarrow{3}</math> <math>\xrightarrow{1}</math></p>                                                          | 7 {<br>This study (Figure EV5)                                                         | $-\Delta L + \Delta E = +11\%$             |
| <b>Late (1)</b>                                                                                                                                                                                                                                                                                                                                                                                                                                                              |                                                                                        |                                            |
| <p>Mod <math>\xrightarrow{2x FIV}</math> <math>\beta^A</math> pro <math>\xrightarrow{IL2R}</math> polyA <math>\xrightarrow{2x FIV}</math> <math>\beta-act\ pro</math> <math>\xrightarrow{BsR}</math></p> <p>Wt <math>\xrightarrow{Late1}</math></p>                                                                                                                                                                                                                          | 2 {<br>This study (Figure 8A.)                                                         | $-\Delta L + \Delta E = +29.3\% / +51.7\%$ |
| <b>Late (2)</b>                                                                                                                                                                                                                                                                                                                                                                                                                                                              |                                                                                        |                                            |
| <p>Mod <math>\xrightarrow{2x FIV}</math> <math>\beta^A</math> pro <math>\xrightarrow{IL2R}</math> polyA <math>\xrightarrow{2x FIV}</math> <math>\beta-act\ pro</math> <math>\xrightarrow{BsR}</math></p> <p>Wt <math>\xrightarrow{Late2}</math></p>                                                                                                                                                                                                                          | 3 {<br>This study (Figure 8B.)                                                         | $-\Delta L + \Delta E = +19.1\%$           |



Appendix Table S2

|                                                                                               | Construction tested / site                  | Both concentration | With concentration | Ratio With/Both |
|-----------------------------------------------------------------------------------------------|---------------------------------------------|--------------------|--------------------|-----------------|
| Insertions at site mid-1                                                                      |                                             |                    |                    |                 |
| $\beta$ -actin (1)                                                                            | $\beta$ -actin / 1                          | 0.97               | 0.45               | 0.47            |
| $\beta$ -actin (2)                                                                            |                                             | 0.78               | 0.32               | 0.41            |
| $\beta$ -actin (3)                                                                            |                                             | 0.63               | 0.37               | 0.59            |
| $\beta$ -actin (4)                                                                            |                                             | 0.97               | 0.62               | 0.63            |
| $\beta$ -actin (5)                                                                            |                                             | 0.93               | 0.41               | 0.44            |
| $\beta^A$ -globin+ $\beta$ -actin (1)                                                         | $\beta^A$ -globin+ $\beta$ -actin / 1       | 1.34               | 0.71               | 0.53            |
| $\beta^A$ -globin+ $\beta$ -actin (2)                                                         |                                             | 1.29               | 0.65               | 0.5             |
| $\beta^A$ GFP h.K7+ $\beta^A$ -globin+ $\beta$ -actin (1)                                     |                                             | 0.81               | 0.45               | 0.55            |
| $\beta^A$ GFP h.K7+ $\beta^A$ -globin+ $\beta$ -actin (2)                                     |                                             | 0.84               | 0.43               | 0.51            |
| $\beta^A$ GFP h.K7+ $\beta^A$ -globin+ $\beta$ -actin (3)                                     |                                             | 0.74               | 0.4                | 0.54            |
| $\beta^A$ GFP h.K7+ $\beta^A$ -globin+ $\beta$ -actin (4)                                     |                                             | 0.91               | 0.45               | 0.49            |
| LoxP_LE (1)                                                                                   | LoxP_LE / 1                                 | 0.58               | 0.28               | 0.48            |
| Insertions at site mid-2                                                                      |                                             |                    |                    |                 |
| $\beta^A$ GFP h.K7 (1)                                                                        | $\beta^A$ GFP h.K7 / 2                      | 1.12               | 0.54               | 0.49            |
| Insertions at site mid-3                                                                      |                                             |                    |                    |                 |
| $\beta^A$ -globin+ $\beta$ -actin + $\beta^A$ GFP h.K7 (1)                                    | $\beta^A$ -globin+ $\beta$ -actin / 3       | 1.04               | 0.57               | 0.55            |
| $\beta^A$ -globin+ $\beta$ -actin + $\beta^A$ GFP h.K7 (2)                                    |                                             | 1.59               | 0.59               | 0.37            |
| $\beta^A$ -globin+ $\beta$ -actin + $\beta^A$ GFP h.K7 (3)                                    |                                             | 1.08               | 0.43               | 0.4             |
| Insertions at site mid-1 and mid-3                                                            |                                             |                    |                    |                 |
| $\beta^A$ -globin+ $\beta$ -actin + $\beta^A$ GFP h.K7+ $\beta^A$ -globin+ $\beta$ -actin (1) | $\beta^A$ -globin+ $\beta$ -actin / 1 and 3 | 0.56               | 0.73               | 1.29            |
| $\beta^A$ -globin+ $\beta$ -actin + $\beta^A$ GFP h.K7+ $\beta^A$ -globin+ $\beta$ -actin (2) |                                             | 0.54               | 0.58               | 1.07            |
| $\beta^A$ -globin+ $\beta$ -actin + $\beta^A$ GFP h.K7+ $\beta^A$ -globin+ $\beta$ -actin (3) |                                             | 1.15               | 1.33               | 1.16            |
| $\beta^A$ -globin+ $\beta$ -actin + $\beta^A$ GFP h.K7+ $\beta^A$ -globin+ $\beta$ -actin (4) |                                             | 0.87               | 0.99               | 1.13            |
| $\beta^A$ -globin+ $\beta$ -actin + $\beta^A$ GFP h.K7+ $\beta^A$ -globin+ $\beta$ -actin (5) |                                             | 0.83               | 0.94               | 1.13            |
| $\beta^A$ -globin+ $\beta$ -actin +LoxP_LE (1)                                                | LoxP_LE / 1                                 | 3.34               | 2.21               | 0.66            |
| $\beta^A$ -globin+ $\beta$ -actin +LoxP_LE (2)                                                |                                             | 2.19               | 1.39               | 0.63            |
| $\beta^A$ -globin+ $\beta$ -actin +LoxP_LE (3)                                                |                                             | 2.12               | 1.13               | 0.53            |
| $\beta$ -actin (1+3) (1)                                                                      | $\beta$ -actin / 3                          | 1.17               | 0.71               | 0.61            |
| $\beta$ -actin (1+3) (2)                                                                      |                                             | 1.23               | 0.78               | 0.64            |
| $\beta$ -actin (1+3) (3)                                                                      |                                             | 1.22               | 0.7                | 0.57            |
| $\beta$ -actin (1+3) (4)                                                                      |                                             | 0.95               | 0.52               | 0.55            |
| $\beta$ -actin (1+3) (5)                                                                      |                                             | 1.04               | 0.57               | 0.54            |
| $\beta^A$ -globin (1+3) (1)                                                                   | $\beta^A$ -globin / 1 and 3                 | 0.65               | 0.63               | 0.97            |
| $\beta^A$ -globin (1+3) (2)                                                                   |                                             | 0.74               | 0.62               | 0.83            |
| $\beta^A$ -globin (1+3) (3)                                                                   |                                             | 0.92               | 1.2                | 1.31            |
| $\beta^A$ -globin (1+3) (4)                                                                   |                                             | 0.77               | 1.0                | 1.30            |
| $\beta^A$ -globin (1+3) (5)                                                                   |                                             | 0.75               | 0.66               | 0.88            |
| $\beta^A$ -globin (1+3) (6)                                                                   |                                             | 0.2                | 0.22               | 1.1             |
| Insertions at site late-1                                                                     |                                             |                    |                    |                 |
| $\beta^A$ -globin+ $\beta$ -actin (1)                                                         | $\beta^A$ -globin+ $\beta$ -actin / late 1  | 2.15               | 0.96               | 0.45            |
| $\beta^A$ -globin+ $\beta$ -actin (2)                                                         |                                             | 1.71               | 0.75               | 0.44            |
| Insertions at site late-2                                                                     |                                             |                    |                    |                 |
| $\beta^A$ -globin+ $\beta$ -actin (1)                                                         | $\beta^A$ -globin+ $\beta$ -actin / late 2  | 1.6                | 0.59               | 0.37            |
| $\beta^A$ -globin+ $\beta$ -actin (2)                                                         |                                             | 1.37               | 0.5                | 0.36            |
| $\beta^A$ -globin+ $\beta$ -actin (3)                                                         |                                             | 0.98               | 0.43               | 0.44            |



Appendix Table S3

| Primer name                | Primer sequence                                                                            | Insertion site  | galGal5 Assembly | Amplicon size |
|----------------------------|--------------------------------------------------------------------------------------------|-----------------|------------------|---------------|
| 5'arm ML1                  | (Hassan-Zadeh et al., 2012)                                                                | site mid-late 1 | chr1:72,565,520  |               |
| 3'arm ML1                  |                                                                                            |                 |                  |               |
| 5'arm ML2 Up               | CCAAACCAGGCCACTCTTAGT                                                                      | site mid-late 2 | chr1: 72,548,589 | 2,163 bp      |
| 5'arm ML2 Low              | AGTCACTTGGCATAAATAAGAAGCC                                                                  |                 |                  |               |
| 3'arm ML2 Up               | CTGAGCAGGAAGGGAAACGA                                                                       |                 |                  |               |
| 3'arm ML2 Low              | CCATAGTGCAGACCTGGCAT                                                                       |                 |                  |               |
| 5'arm ML3 Up               | ACACACTCACCTCCTGCCTT                                                                       | site mid-late 3 | chr1: 72,536,060 | 2,054 bp      |
| 5'arm ML3 Low              | AGATCTCAGTCCTGCCAGCA                                                                       |                 |                  |               |
| 3'arm ML3 Up               | AAGTTCGTAATACACAACCTTGAC                                                                   |                 |                  |               |
| 3'arm ML3 Low              | GCTTCCCCGCTTCTTCCCTA                                                                       |                 |                  |               |
| 5'arm L1 Up                | CAGTGAAACACAGGAGGAACA                                                                      | site late 1     | chr1:70,523,649  | 2,244 bp      |
| 5'arm L1 Low               | TAACTCCAAGAACGATCACTGC                                                                     |                 |                  |               |
| 3'arm L1 Up                | GGAAATGTCTTGAATCTCACAAAG                                                                   |                 |                  |               |
| 3'arm L1 Low               | ATGCCACCAGTGTCATAA                                                                         |                 |                  |               |
| 5'arm L2 Up                | ACTTGTTGAGCCTTTATGGAGAAC                                                                   | site late 2     | chr1:177,936,192 | 1996 bp       |
| 5'arm L2 Low               | CGGTGTTACAGAGGAGTAAACTGA                                                                   |                 |                  |               |
| 3'arm L2 Up                | ACCTTATGCATTTTCGTTCTATGT                                                                   |                 |                  |               |
| 3'arm L2 Low               | TAAGAAGAGAGATGGGGATCAAAC                                                                   |                 |                  |               |
| 2XFIV $\beta^A$ globin-Up  | GGGGACAACCTTTGTATACAAAAGTTGAGGTGGCACGGGATCGCTTTCCTAGGTGGCACGGGATCGCTTTCCTCTGCCACACCCCTCCTG |                 |                  |               |
| 2XFIV $\beta^A$ globin-Low | GGGGACAACCTTTGTATAGAAAAGTTGGTGGGTACCACTAGTGATGATCCGTATCCAGACATG                            |                 |                  |               |
| 2XFIV $\beta$ -actin-Up    | GCTCGAGAGGTGGCACGGGATCGCTTTCCTAGGTGGCACGGGATCGCTTTCCTGTGAGC CCCACGTTCTGCTT                 |                 |                  |               |
| 2XFIV $\beta$ -actin-Low   | CTTCTGTGCTACTTCTAC                                                                         |                 |                  |               |
| XhoI+2xFIV-Up              | GACTCTCGAGAGGAAAGCGATCCCGTGCCACCTAGGAAAGCGATCCCGTGCCACCTGTAGCCCTGATCAATAACT                |                 |                  |               |
| XhoI+2xFIV-Low             | AAGTCCCTCGAGCGTATTACAATCACTGGCCGT                                                          |                 |                  |               |
| $\beta^A$ -Up              | CTGCCACACCCCTCCTG                                                                          |                 |                  |               |
| $\beta^A$ -Low             | TTCCTGACCCTTGGGACCA                                                                        |                 |                  |               |
| GFP-Up                     | GGGTCAGGAAATGGTGAGCAAGGGCGAGG                                                              |                 |                  |               |
| GFP-Low                    | TGAAGCAGCATTACGCCTTAAG                                                                     |                 |                  |               |
| h.K7-Up                    | TGCTGCTTCATTTCTGCTCTC                                                                      |                 |                  |               |
| h.K7-Low                   | GCAGAGCCAGAGTCCAAGAG                                                                       |                 |                  |               |
| loxP RE-h.K7-Up            | GGATCCATAACTTCGTATAGCATACATTATACGAACGGTAACTTGAGCCCAGGAGTTCGA                               |                 |                  |               |
| loxP RE-h.K7-rev           | AGAGTTCCAACCCAGCCTC                                                                        |                 |                  |               |

Appendix Table S4

|                                                                                 | Forward primer sequence       | Reverse primer sequence        | Genomic position<br>(Build Dec 2015) |
|---------------------------------------------------------------------------------|-------------------------------|--------------------------------|--------------------------------------|
| Replication timing analysis                                                     |                               |                                |                                      |
| With on <i>GFP</i> reporter                                                     | GGAATTCGATAGCTTGGCGGC         | GCTGAACTTGTGGCCGTTTAC          |                                      |
| With on insertion site 2                                                        | GTAATGAAATTCAGCAATGACAGGC     | TCCTATCTGTTCAAATGTGCATCAG      | chr1:72548543+72548676               |
| With on $\beta^A$ - <i>globin</i> + $\beta$ - <i>actin</i>                      | GGGACTGCTCACGTTTCATCA         | AATGTGGCGTGTGGGATCTC           |                                      |
| With on $\beta$ - <i>actin</i>                                                  | TGCAGAAATCGGAGGAAGAAGA        | GAATTGCCGCTCCCACATGA           |                                      |
| Without or Wt allele insertion site 1                                           | CAGGACAGCAGGTATTCACA          | GGCCTGAACACTGTGTCAAT           | chr1:72565497+72565651               |
| Without or Wt allele insertion site 2                                           | GTAATGAAATTCAGCAATGACAGGC     | TCCTATCTGTTCAAATGTGCATCAG      | chr1:72548543+72548676               |
| Without on <i>GFP</i> reporter site 2                                           | GGAATTCGATAGCTTGGCGGC         | GCTGAACTTGTGGCCGTTTAC          |                                      |
| Wt allele insertion site 3                                                      | TGGTACAGGCTGAGGACACC          | TGATGACTGCAGCTTCTTCT           | chr1:72535996+72536105               |
| Without or Wt allele insertion site late1                                       | CCCTTGAATCAGACCCCTTGA         | CCCTCCTTTCTCCATAAAAACA         | chr1:70523547+70523674               |
| Without or Wt allele insertion site late 2                                      | TTTACACTACTCCCACCCCTCG        | TTGACCATATGCCACCAACACC         | chr1:177936339+177936438             |
| Controls                                                                        |                               |                                |                                      |
| Both or 1+ 5 kb                                                                 | TCCATACAGCCACAACAGCA          | TGTGGAAAGTTCAGTCCAGG           | chr1:72570952+72571067               |
| Both or late 1- 4.8 kb                                                          | TGTACTTCTCTGTGGACATGCA        | TGGCACAGAGGACAGGTAAGA          | chr1:70518727+70518810               |
| Both or late 2 - 3.6kb                                                          | CAAGGTTTCCACCCCTAAAGA         | TGATGGATGTGGGAAAGAAA           | chr1:177932452+ 177932533            |
| Early timing control                                                            | GACGGTCAGGTTTGCCAAAG          | TCCTGAGGATACGTTTTTCAG          | chr1: 194563998+194564262            |
| Mitochondrial DNA                                                               | CATCCCATGCATAACTCCTG          | GTAGTCCAGGCTTCACTTGA           | chrM:541+731                         |
| Chlps, Chromatin accessibility and RNA quantification                           |                               |                                |                                      |
| 5' 2xFIV-1                                                                      | GGGCTATTACGTTGTCTAG           | GCCACCTCAACTTTTGTATAC          |                                      |
| 5' 2xFIV-3                                                                      | TTATGCTGCGAGGACTGAGA          | GTGGGCAGAGGAAAGCGAT            |                                      |
| $\beta^A$ pro 1                                                                 | GGGAGCAAGGCCACAGAC            | GTGAGCAGTCCCACATCAG            |                                      |
| $\beta^A$ pro 2                                                                 | GGGACTGCTCACGTTTCATCA         | AATGTGGCGTGTGGGATCTC           |                                      |
| <i>IL2R</i> gene                                                                | CTACACAGAGGTCTGCTG            | GTGAAGAGAAAGCCTCAGGCA          |                                      |
| 3' 2xFIV-1                                                                      | TGCATTTAGTTGTGTTTGTCC         | ACCGTCGACCAACTTTGTATAGA        |                                      |
| 3' 2xFIV 1-3                                                                    | AAGCTTGGATCCCTACCGT           | GAGAGTGAAGCAGAACGTGGG          |                                      |
| 5' $\beta$ - <i>actin</i> pro                                                   | GTGGGACTTCTTCTAAAGGGCTA       | TGATCAATAAATTCGTATAATGTATGCT   |                                      |
| $\beta$ - <i>actin</i> pro                                                      | TGCAGAAATCGGAGGAAGAAGA        | GAATTGCCGCTCCCACATGA           |                                      |
| <i>BsR</i> gene                                                                 | CGGACGATCATTGAAGCGT           | CCCTACACATACCACAAGGA           |                                      |
| <i>PuroR</i> gene                                                               | ACGACCTTCCATGACCGAGT          | AGTTCTTGACGCTCGGTGAC           |                                      |
| $\beta^A$ - <i>GFP</i>                                                          | GGAATTCGATAGCTTGGCGGC         | GCTGAACTTGTGGCCGTTTAC          |                                      |
| <i>GFP</i> gene                                                                 | GCCGACAACCCTACCTGAG           | GCTTTACTTGTACAGCTCGTCCA        |                                      |
| <i>hK7</i>                                                                      | AAATTTATCATTTGTGTGGCAGTCA     | GTTCTGGTGGGTTGTATGTCCAC        |                                      |
| LoxP site                                                                       | CGCCCTATAGTGATGCTATTACA       | TGTTAAATGTTTGTAGCCTGCCT        |                                      |
| cond1                                                                           | CATCTGTGCTCTGGGTCCA           | AAGGAGTGAAGGCAACGCATC          | chr1:194546368+194546497             |
| cond 2                                                                          | TTGGTGCAAGTGCCTCAGATAG        | ATGTGCTTGTACAGATGGAT           | chr1:194546457+194546563             |
| <i>MED 14</i> pro                                                               | GGATTCACACTGTTCCCTCC          | TGCATGTTTCTCTCATCCGAAGT        | chr1:112227330+112227461             |
| <i>BU1A</i> pro                                                                 | CTCTGTAGCCAGATCGTCTTCTC       | GTGTCAGCTCATCTAGGCAATC         | chr1:91922377+91922546               |
| <i>BU1A</i> gene                                                                | AATGTCCCCAAATGAGCTG           | CCTCTTTTCCACCTCCTC             | chr1:91923373+91923517               |
| <i>MED 14</i> gene                                                              | TGGGCTAATAATGCTGGAAAGGT       | TAGAGAAGCCAGACGATCAGCA         | chr1:112236082+112236823             |
| Long-range amplifications                                                       |                               |                                |                                      |
| LR 1+2                                                                          | AAGGGTCAGCTTTCGTGATAATCTGG    | ACCTCTCTTGCAATTCACAGTCAACA     |                                      |
| LR 1+2 ctrl                                                                     | GCAAGATGGGCAGAGCTGAGTTAAACAAT | TGTCCTGTAAGTCTGGCAAAACAAGA     | chr1:72548824+72565503               |
| LR 2+3                                                                          | GAGCGTATTACAATTCAGTGGCCGTC    | CTTGCTCACCATTTCTGACCCCTTG      |                                      |
| LR 2+3 ctrl                                                                     | GCAGTATAACAAGCAGCCTGAAGTAAA   | CAGTCTTATCCCACCCCTCCGTATAG     | chr1:72536307+72548324               |
| LR 1+3                                                                          | GAGCGTATTACAATTCAGTGGCCGTC    | GATCCCGTGCCACCTCAACTTTTGTAT    |                                      |
| LR loxP LE(1)+ $\beta^A$ - <i>globin</i> + $\beta$ - <i>actin</i> (3)           | GAGCGTATTACAATTCAGTGGCCGTC    | GACGTTGTGGCTGTTGATGTACTC       |                                      |
| LR $\beta^A$ - <i>globin</i> (1+3)                                              | TCCAATTCGCCCTATAGTGAGTCGTA    | GATCCCGTGCCACCTCAACTTTTGTAT    |                                      |
| LR $\beta$ - <i>actin</i> (1+3)                                                 | CTCCAATTCGCCCTATAGTGAGTCGTA   | GATACCCGTCGACCAACTTTGTATAGAAAA |                                      |
| LR 1+3 ctrl                                                                     | GCAGTATAACAAGCAGCCTGAAGTAAA   | TGTCCTGTAAGTCTGGCAAAACAAGA     | chr1:72597486+72626682               |
| Screening of targeted integration                                               |                               |                                |                                      |
| 3'-screening-site 2 for <i>GFP</i> reporter                                     | GCTCCAATTCGCCCTATAGTGA        | GGCACTCCATTTCCATCTCCT          |                                      |
| 5'-screening-site 3 for $\beta^A$ - <i>globin</i> + $\beta$ - <i>actin</i>      | GGACTGGCTAGGGAACAAGAG         | TCTGCCTTCTCCCTGATAACG          |                                      |
| 5'-screening-site 1 for $\beta^A$ - <i>globin</i> + $\beta$ - <i>actin</i>      | GTGCAGCATCAGTGGATAAAGT        | TCTGCCTTCTCCCTGATAACG          |                                      |
| 3'-screening-site 1 for $\beta$ - <i>actin</i>                                  | CCCCCTGAACCTGAAACATAA         | CCACATGTTTATTGCATACGGC         |                                      |
| 3'-screening site 1 for loxP LE                                                 | CCAATTCGCCCTATAGTGAGTCG       | ACGTAACAAATCTACAGGTCTTCG       |                                      |
| 3'-screening site 3 for <i>PuroR</i>                                            | CCCCTGAACCTGAAACATAA          | CTTCCAACCCAGGCCACTATG          |                                      |
| 3'-screening site late 1 for $\beta^A$ - <i>globin</i> + $\beta$ - <i>actin</i> | GAGCTCCAATTCGCCCTAT           | ACTATTGTACCCCTCCCTGTTG         |                                      |
| 3'-screening site late 2 for $\beta^A$ - <i>globin</i> + $\beta$ - <i>actin</i> | GAGCTCCAATTCGCCCTAT           | GGTCTGATCCCTATCTCATTGG         |                                      |
| Screening of site specific excision                                             |                               |                                |                                      |
| <i>BsR</i> excision at site 2                                                   | CCCCCTGAACCTGAAACATAA         | TATCCCACTGCCACTGGAGG           |                                      |
| <i>PuroR</i> excision at site 3                                                 | TGCATTCAGTTGTGGTTTGTCC        | GGTCTGAGAGTCTTGTCTGGA          |                                      |
| Large 1+3 excision Up/Low                                                       | GGTTCTGGTGCCTCATTGAT          | TGCTCTGCTAGAAATGCCTGT          | chr1:72535815+72565623               |
| Ctrl                                                                            | ACCCAAGGCAGGCTACAAAC          | TGAGTTACTTTGGCATTACTTTTCATC    | chr1:72565577+72567483               |
| No <i>PuroR</i> excision                                                        | CCCCCTGAACCTGAAACATAA         | GCAGCCTTTCCAGCAAGAC            |                                      |
| No <i>BsR</i> excision                                                          | ACGACCTTCCATGACCGAGT          | AGTTCTTGACGCTCGGTGAC           |                                      |
| <i>PuroR</i> excision                                                           | CACGCCACATTCAAAGCCATG         | TCCAGCAAGACCTCTCAGACC          |                                      |
| <i>BsR</i> excision                                                             | CAGCGGAGACAGAGGAAGAGT         | GGCATGGTTTTGATTTCTGGCC         |                                      |
| Copy number quantification                                                      |                               |                                |                                      |
| loxP LE                                                                         | CGCCCTATAGTGAGTCGATTACA       | TGTTAAATGTTTGTAGCCTGCCT        |                                      |
| <i>PuroR</i>                                                                    | ACGACCTTCCATGACCGAGT          | AGTTCTTGACGCTCGGTGAC           |                                      |

| name      | length    | GC   | DpnII sites/bp | sample  | total interactions | cis percent |
|-----------|-----------|------|----------------|---------|--------------------|-------------|
| allele1+3 | 2532      | 56.7 | 0.0043         | clone 4 | 2433               | 67.41       |
| allele1+3 | 2532      | 56.7 | 0.0043         | clone 5 | 2369               | 69.78       |
| allele2   | 2509      | 46.2 | 0.0032         | clone 4 | 1318               | 80.2        |
| allele2   | 2509      | 46.2 | 0.0032         | clone 5 | 1290               | 78.53       |
| chr1      | 196202544 | 40   | 0.0021         | clone 4 | 121564119          | 81.08       |
| chr1      | 196202544 | 40   | 0.0021         | clone 5 | 116517761          | 80.63       |

**Appendix Figure S1: Quantitative analysis of RT shifts by two distinct calculation methods reveals cooperation between two combinations of *cis*-regulatory elements**

A. Method for allele-specific analysis of RT by real-time PCR quantification. BrdU pulse-labeled cells were sorted into four S-phase fractions (S1 to S4) and the immunoprecipitated newly synthesized strands (NS) were quantified by real-time qPCR in each fraction. Specific primer pairs determine the RT profile for the modified allele (With), the wt allele (Without) and both alleles (Both). The endogenous *β-globin* locus was analysed as an early-replicated control.

B-C. Two methods of calculation were used to determine the difference in RT between the wt and modified alleles: the  $-\Delta L + \Delta E$  method and the  $\Delta$ Slope method.

D. The analysis of the correlation between the  $\Delta$ Slope and the  $-\Delta L + \Delta E$  method for all clonal cell lines previously published (Hassan-Zadeh et al., 2012; Valton et al., 2014) or analysed for the first time here is shown. The linear regression curve is shown, with the corresponding equation and the coefficient of determination ( $R^2$ ).

**Appendix Figure S2: Endogenous genomic features of early-replicated domains containing the *β-globin* and *β-actin* loci**

A-B. UCSC genome browser visualization (galGal5) of 4 Mb genomic windows inside either the *β-globin* locus of chromosome 1 or the *β-actin* locus of chromosome 14 are shown. Annotated genes are represented and the *β<sup>A</sup>-globin* and the *β-actin* genes are indicated by a red arrow. Track of eigenvector 1 values corresponding to A/B compartments at 25 kb resolution after Hi-C analysis are represented. Tracks of nascent strands (NS) enrichments obtained after cells sorting into four S-phase fractions, BrdU pulse-labeled nascent strands (NS) immunoprecipitation, and sequencing were represented separately (S1 to S4) for the wt cell line in dense configuration. Below, an enlargement of either the *β<sup>A</sup>-globin* or the *β-actin* promoter region with the ectopic sequence found in our constructs and the single reads from SNS aligned previously published (Massip et al., 2019) are reported.

**Appendix Figure S3: P-value distribution for the effect of the  $\beta^A$ -globin +  $\beta$ -actin construct on RT in the mid-late locus**

A. Replication timings of the WT and the  $2\times(\beta^A$ -globin +  $\beta$ -actin) insert were smoothed using 500kb sliding windows, then centered and normalized so that the variability of timings were comparable between the two conditions.

B. A t-test was performed for each window to assess the significance of the timing differences. Adjusted p-values were computed for each window and smoothed using the PLIS R-package (Wei et al., 2009) to account for their spatial genomic dependency. P-values were then adjusted by the Benjamini-Hochberg procedure to ensure the control of the False Discovery Rate. The dotted line corresponds to a FDR of 5%.

**Appendix Figure S4: Interaction profiles of allele 1+3/2 with chromosome 1 for clones 4 and 5**

A. Interaction profiles of allele 1+3/2 with chr1 for clone 4 Hi-C libraries: distance-corrected interactions, *i.e.* observed/expected (OE), binned at 500 kb with corresponding compartment (EV1) tracks.

B. OE interactions of allele 1+3 (orange rectangles) and allele 2 (blue rectangles) averaged over A and B compartments for p and q-arms at 100kb bin size for clone 4. Values corresponding to OE interactions of allele 1+3 and allele 2 averaged over shuffled A (red circles, N=1000) and B compartments (blue circles, N=1000) for p and q-arms. ns, not significant; \*p<0.05; \*\*p<0.01;\*\*\*p<0.001.

C. Scatterplot of density of interactions between allele 1+3 and allele 2 with chromosomes larger than 5,000,000 bp for clone 4.

D. Interaction profiles of allele 1+3/2 with chr1 for clone 5 Hi-C libraries : distance-corrected interactions, *i.e.* observed/expected (OE), binned at 500 kb with corresponding compartment (EV1) tracks.

E. OE interactions of allele 1+3 (orange rectangles) and allele 2 (blue rectangles) averaged over A and B compartments for p and q-arms at 100kb bin size for clone 5. Values corresponding to OE interactions of allele 1+3 and allele 2 averaged over shuffled A (red circles, N=1000) and B compartments (blue circles, N=1000) for p and q-arms. ns, not significant; \*p<0.05; \*\*p<0.01;\*\*\*p<0.001.

F. Scatterplot of density of interactions between allele 1+3 and allele 2 with chromosomes larger than 5,000,000 bp for clone 5.

**Appendix Figure S5: Validation of MNase digestion patterns before and after size selection (Related to Figure 6 and EV4)**

A-B. Chromatin was extracted from two clonal cell lines for each construct or combination ( $\beta^A$ -globin,  $\beta$ -actin,  $\beta^A$ -globin+ $\beta$ -actin, 1+2+3, 1+3 and *loxP\_LE* (1)+  $\beta^A$ -globin+ $\beta$ -actin (3) and partially digested with exponentially increasing concentrations of micrococcal nuclease (MNase; 2.5, 10, 40 and 160 U/mL).

A. After purification, DNA molecules were subjected to a size selection process that removed most DNA molecules over 1000 bp.

B. The four digested DNA samples obtained for each clonal cell line were subjected to electrophoresis in a 1% w/v agarose gel before and after size selection and stained with SYBR safe. The DNA size marker was a commercial 1 kb plus ladder.

**Appendix Figure S6: Validation of the semi-quantitative PCR approach used to determine the spatial proximity of different combination of *cis*-regulatory elements separated by 30 kb (Related to Figure 5)**

A-B. Images of agarose gels used for the quantification of specific products obtained after either the large 1+3 and *loxP\_LE* (1)+  $\beta^A$ -globin+ $\beta$ -actin (3) excision in 1+2+3, 1+3 and *loxP\_LE* (1)+  $\beta^A$ -globin+ $\beta$ -actin (3) clonal cell lines or the large  $\beta$ -actin (1+3) excision in  $\beta$ -actin (1+3) clonal cell line are shown. After 1, 8, 24 and 48 h of 4-hydroxytamoxifen treatment, genomic DNA was extracted and quantified by semi-quantitative PCR. PCR products specific for the large 1+3 or *loxP\_LE* (1)+  $\beta^A$ -globin+ $\beta$ -actin (3) excision (3.4 kb, in a thick black lines, Up and Low large excision, A left gels), and for the large  $\beta$ -actin (1+3) excision (542 bp, in a thick black lines, Up and Low large excision, B left gels) or used for normalization (1.9 kb, amplification from both chromosomes, in a thick black line, Ctrl, A and B right gels) were run on a 0.8% or 1% w/v agarose gel, respectively, and stained with SYBR safe. The DNA size marker was a commercial 1 kb plus ladder.

#### **Appendix Figure S7: PCR validation of clones selected for homologous recombination**

A-H. Schematic diagrams showing genomic region containing a site-specific integrated construct. The 5' and 3' arms of the targeted vector are shown as black boxes. Arrows #1 and #2 represent primer sets used for the analysis of correct integration of the constructs by homologous recombination. Other arrows represent primer sets used for the analysis of the correct excision of the *BsR* gene at site 2 (#3 and #4) or the correct excision of the *PuroR* gene at site 3 (#5 and #6). PCR products were subjected to electrophoresis in a 1-1.5% w/v agarose gel and stained with SYBR safe. The DNA size marker was a commercial 1 kb plus DNA ladder (M). Lanes marked with a red star correspond to clonal cell lines selected for further analysis.

A-C. Insertion site 1, containing the  $\beta$ -actin construct, one *loxP\_LE* element or the  $\beta^A$ -globin+ $\beta$ -actin construct is shown.

D. Insertion site 2 containing the *GFP* reporter construct is shown.

E-F. Insertion site 3, containing the  $\beta^A$ -globin+ $\beta$ -actin or the  $\beta$ -actin construct construct is shown.

G-H. The two genomic regions containing the  $\beta^A$ -globin+ $\beta$ -actin construct inserted at the late 1 or late 2 site are shown.

A-H. The sizes of the different PCR products obtained after amplification with primers #1 and #2, to check for correct integration, are 2.4 kb (A), 2.6 kb (B), 2.3 kb (C), 2.6 kb (D, left gel), 2.3 kb (E except the last right gel), 2.9kb (F), 2.6 kb (G) and 2.2 kb (H). The sizes of the different PCR products for the screening of cell lines correctly recombined for the *BsR* gene cassette after amplification with primers #3 and #4 are 2.1 kb (D, insertion site 2, right gel) or 1.2 kb with the primers #5 and #6 (F, insertion site 3, last right gel). The clonal cell line containing the *GFP* reporter construct without the *BsR* cassette at site 2 (D, 1-*BsR*) was used for further insertions at site 1 (B, #2 and C, #3 to #6) or at site 3 (E, #1 to #4). The clonal cell lines containing the *GFP* reporter construct without the *BsR* cassette at site 2 and one autonomous replicon at site 1 (C, #3, #4, #5) were used for further insertions at site 3 (E #5 to #9). The clonal cell lines containing the *GFP* reporter construct without the *BsR* cassette at site 2 and one *loxP\_LE* at site 1 (B, #2) were used for further insertions of an autonomous replicon at site 3 (E, #10 to #12). Clone 1 with the  $\beta^A$ -*globin* construct inserted at site 1, as previously obtained (Hassan-Zadeh 2012, Fig.6B), was used for the further insertion of a  $\beta^A$ -*globin*+ $\beta$ -*actin* construct at site 3 (E #13 to #18). Clonal cell lines containing two minimal  $\beta^A$ -*globin* modules at sites 1 and 3 were obtained after excision of the *PuroR* cassette at site 3 (E, -*PuroR*, #13 to 18). Clone 2 with the  $\beta$ -*actin* construct inserted at site 1 (B, #2) was used for further insertions of the  $\beta$ -*actin* construct at site 3 (F, #19 to #23).

### **Appendix Figure S8: Validation of transgene integration into the same chromosome**

A. The insertion of transgenes into the same or a different chromosome was analyzed by long-range PCR, with a primer set composed of an upstream primer binding within one construct and a downstream primer binding to the other construct. The amplicons generated after PCR amplification to test for insertion into the same chromosome are represented by red arrows (LR1+2, LR2+3, LR1+3, LR *loxP\_LE* (1)+  $\beta^A$ -*globin*+ $\beta$ -*actin* (3), LR  $\beta^A$ -*globin* (1+3), LR  $\beta$ -*actin* (1+3)). The absence of an amplicon indicates that the two constructs were inserted into distinct chromosomes. The quality of the DNA was checked with primer sets amplifying, on the two chromosomes, a genomic region located between the two insertion sites (black arrows, LR 1+2 ctrl, LR 2+3 ctrl, LR 1+3 ctrl).



B. PCR products were subjected to electrophoresis in a 0.8% w/v agarose gel and stained with SYBR safe. The DNA size marker used was a commercial 20 kb plus ladder. 1+2 clonal lines #3 and #4 were used to generate 1+3 clonal lines #1 and #2 with the *GFP* reporter construct inserted at site 2 on the same chromosome and 1+2 clonal line #2 was used to generate 1+3 clonal lines #3 to #5 with the *GFP* reporter construct inserted at site 2 on the other chromosome. Clonal line with the *GFP* reporter construct inserted at site 2 was used to generate one clonal line with the *loxP\_LE* element inserted at site 1, which itself generated *loxP\_LE* (1)+  $\beta^A$ -globin+ $\beta$ -actin (3) clonal lines #1, #2 and #3 with the *GFP* reporter construct inserted at site 2 on the other chromosome. Clonal line 1 with the  $\beta^A$ -globin construct inserted at site 1, as previously obtained (Hassan-Zadeh 2012, Fig.6B), was used to generate  $\beta^A$ -globin (1+3) clonal lines #1 to #6. Clonal line with the  $\beta$ -actin construct inserted at site 1 was used to generate  $\beta$ -actin (1+3) clonal lines #1 to #5.

#### **Appendix Figure S9: Additional filtering of Hi-C interactions**

A. Heatmap of interaction frequencies for p-arm of chr1, demonstrating the position of the insertion site (red arrow) relative to filtered translocations (blue arrows).

B. Raw and unfiltered interactions profiles for allele 1+3 and allele 2 with chr1 p-arm, observed in two clones and their combination, with the corresponding EV1 compartment track. Translocations are highlighted on the compartment track with light blue color and with blue arrows. The insertion site is highlighted with a red arrow.

C-D. Raw and unfiltered interactions profiles for allele 1+3 and allele 2 with chr1 and chr9, observed in two clones and their combination. Blue arrow indicates the location of the  $\beta^A$ -globin promoter.

**Table 1: Summary of all clonal cell lines (previously published or new clonal lines) analysed in this study**

**Table 2: Transgene copy number determination in clonal cell lines**

The table shows the qPCR results obtained with genomic DNA extracted from the clones selected for the experiments. For each clone, 2 ng of genomic DNA was amplified with a primer set amplifying a sequence within the construct (With) and another primer set amplifying a sequence 5 kb downstream from the insertion site for both alleles (Both). The ratio of the amounts of DNA obtained with the With and Both primer sets was used to determine transgene copy number in all clonal cell lines. For each line, the construct for which the copy number was tested is indicated with the corresponding insertion site.

**Table 3: Primers sets used for plasmids constructions**

**Table 4: Primer sets used for quantitative PCR**

**Table 5: Characterization of the reference sequences of allele 1+3/2**

Characterization of the sequences of allele 1+3 and allele 2 inserts and raw interactions involving the inserts obtained from Hi-C experiments for clones 4 and 5. Characterization of the entire chr1 is added as a reference.

**References**

Hassan-Zadeh, V., Chilaka, S., Cadoret, J.-C., Ma, M.K.-W., Boggetto, N., West, A.G., and Prioleau, M.-N. (2012). USF binding sequences from the HS4 insulator element impose early replication timing on a vertebrate replicator. *PLoS Biol.* *10*, e1001277.

Massip, F., Laurent, M., Brossas, C., Fernández-Justel, J.M., Gómez, M., Prioleau, M.-N., Duret, L., and Picard, F. (2019). Evolution of replication origins in vertebrate genomes: rapid turnover despite selective constraints. *Nucleic Acids Res.* *47*, 5114–5125.

Valton, A.-L., Hassan-Zadeh, V., Lema, I., Boggetto, N., Alberti, P., Saintomé, C., Riou, J.-F., and Prioleau, M.-N. (2014). G4 motifs affect origin positioning and efficiency in two vertebrate replicators. *EMBO J.* *33*, 732–746.

Wei, Z., Sun, W., Wang, K., and Hakonarson, H. (2009). Multiple testing in genome-wide association studies via hidden Markov models. *Bioinformatics* *25*, 2802–2808.
