# Supplementary material for: Clustering of strong replicators associated with active promoters is sufficient to establish an early‐replicating domain
Source: PubMed Central journal article supplement — EMBO J. 2020 Sep 16;39(21):e99520. doi: 10.15252/embj.201899520 (PMC7604622; doi:10.15252/embj.201899520), 2020-09-16
Supplement: EMBJ-39-e99520-s002.pdf [file EMBJ-39-e99520-s002.pdf]

## Expanded View Figures

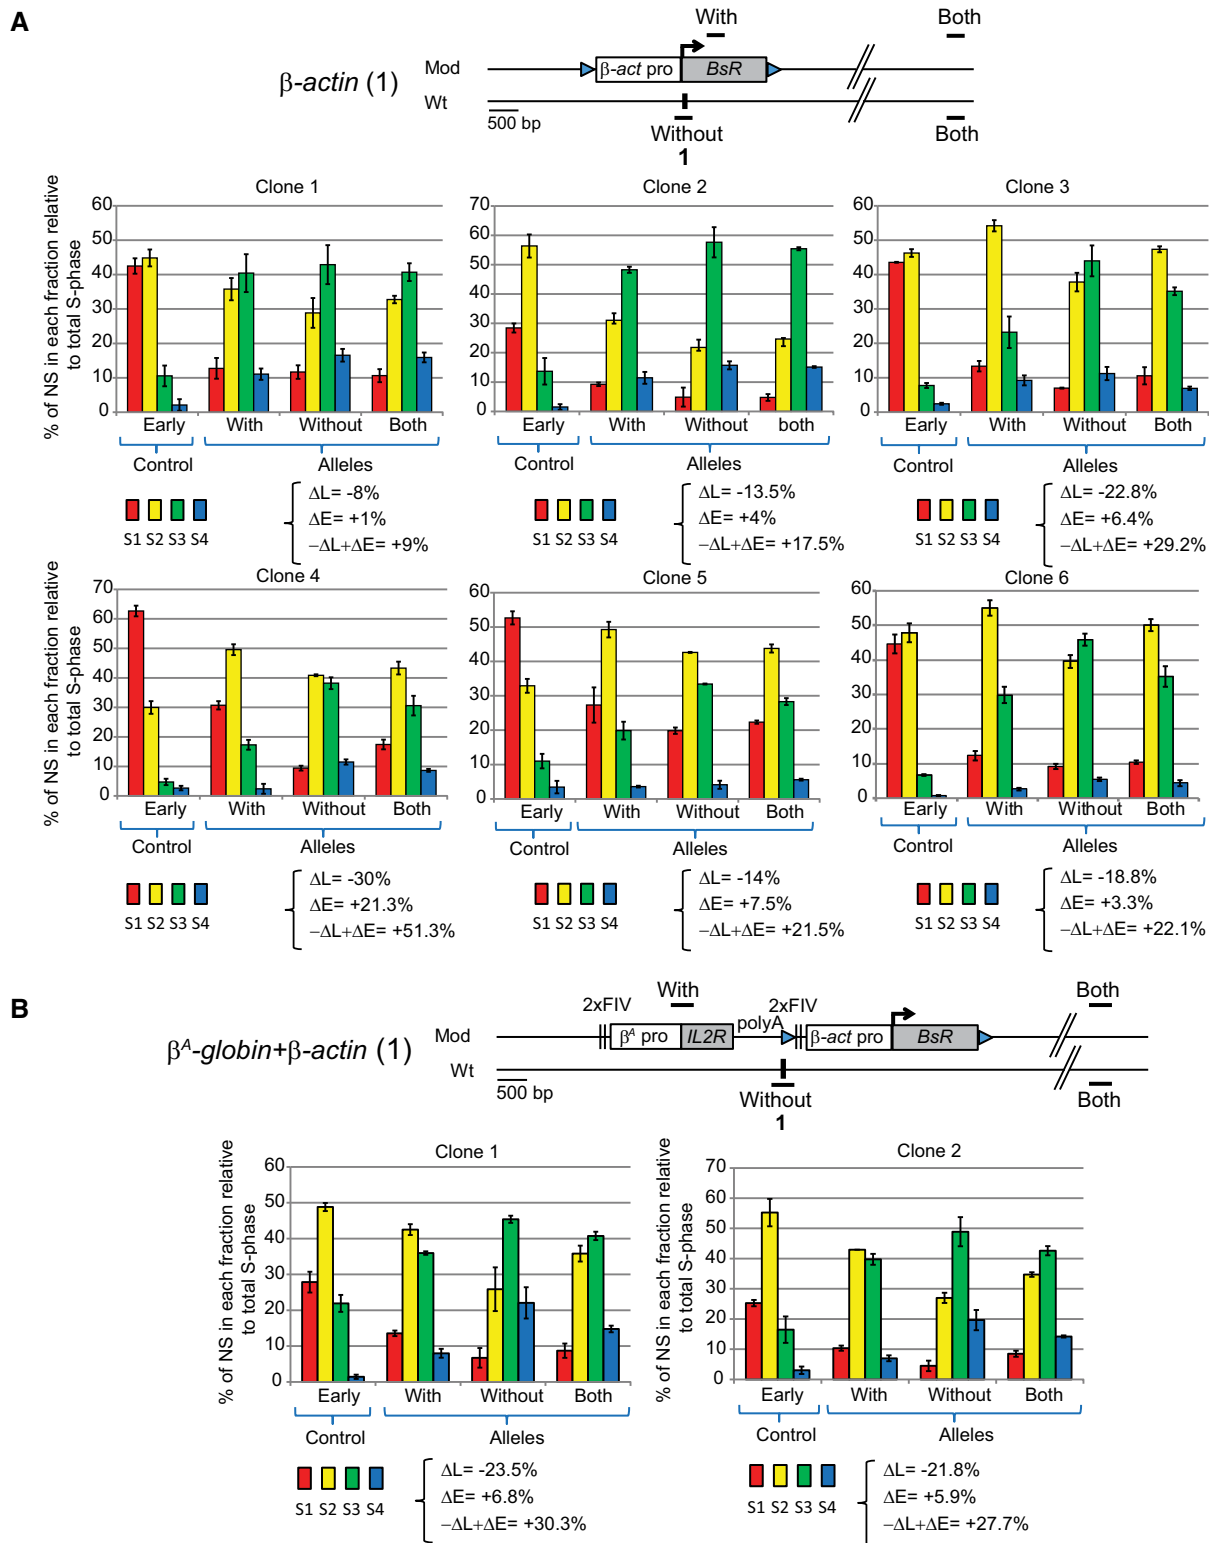

Figure EV1.

**Figure EV1. Additional RT assays for transgenes shifting the timing of replication.**

A, B RT profiles of each chromosomal allele are determined after targeted transgene integration using the allele-specific analysis of RT method by real-time PCR quantification described in Appendix Fig S1. Differences in  $-\Delta L + \Delta E$  values calculated at the target site following transgene integration are indicated. Blue triangles represent reactive *loxP* sites. Error bars correspond to the standard deviation for qPCR duplicates. Analysis of six  $\beta^A$ -globin clonal cell lines (A) or two  $\beta^A$ -globin +  $\beta$ -actin clonal cell lines (B) described in Fig 1 is reported. Black vertical bars represent insertion sites.

**Figure EV2. One advanced replicon inserted at site 1 or at site 3 directs a shift to earlier replication independently of the presence of a GFP reporter construct inserted at site 2.**

RT profiles of each chromosomal allele are determined after targeted transgene integration using the allele-specific analysis of RT method by real-time PCR quantification described in Appendix Fig S1. Differences in  $-\Delta L + \Delta E$  values calculated at the target site following transgene integration are indicated.

- A Analysis of one clonal cell line containing one *GFP* reporter construct composed of the *GFP* reporter gene under the control of the  $\beta^A$ -globin promoter ( $\beta^A$  pro) and linked to a 1.6 kb fragment of human chromosome 7 (h.K7) inserted at site 2.
- B, C Analysis of clonal cell lines containing one  $\beta^A$ -globin +  $\beta$ -actin construct described in Fig 1 inserted at site 1 and one *GFP* reporter construct inserted at site 2 on the same chromosome (B) or on the other chromosome (C).
- D, E Analysis of clonal cell lines containing one  $\beta^A$ -globin+ $\beta$ -actin construct inserted at site 3 and one *GFP* reporter construct inserted at site 2 on the same chromosome (D) or on the other chromosome (E).

Data information: Blue and black triangles represent reactive *loxP* sites and recombined inactive *loxP* sites, respectively. Black vertical bars represent insertion sites. Error bars correspond to the standard deviation for qPCR duplicates.

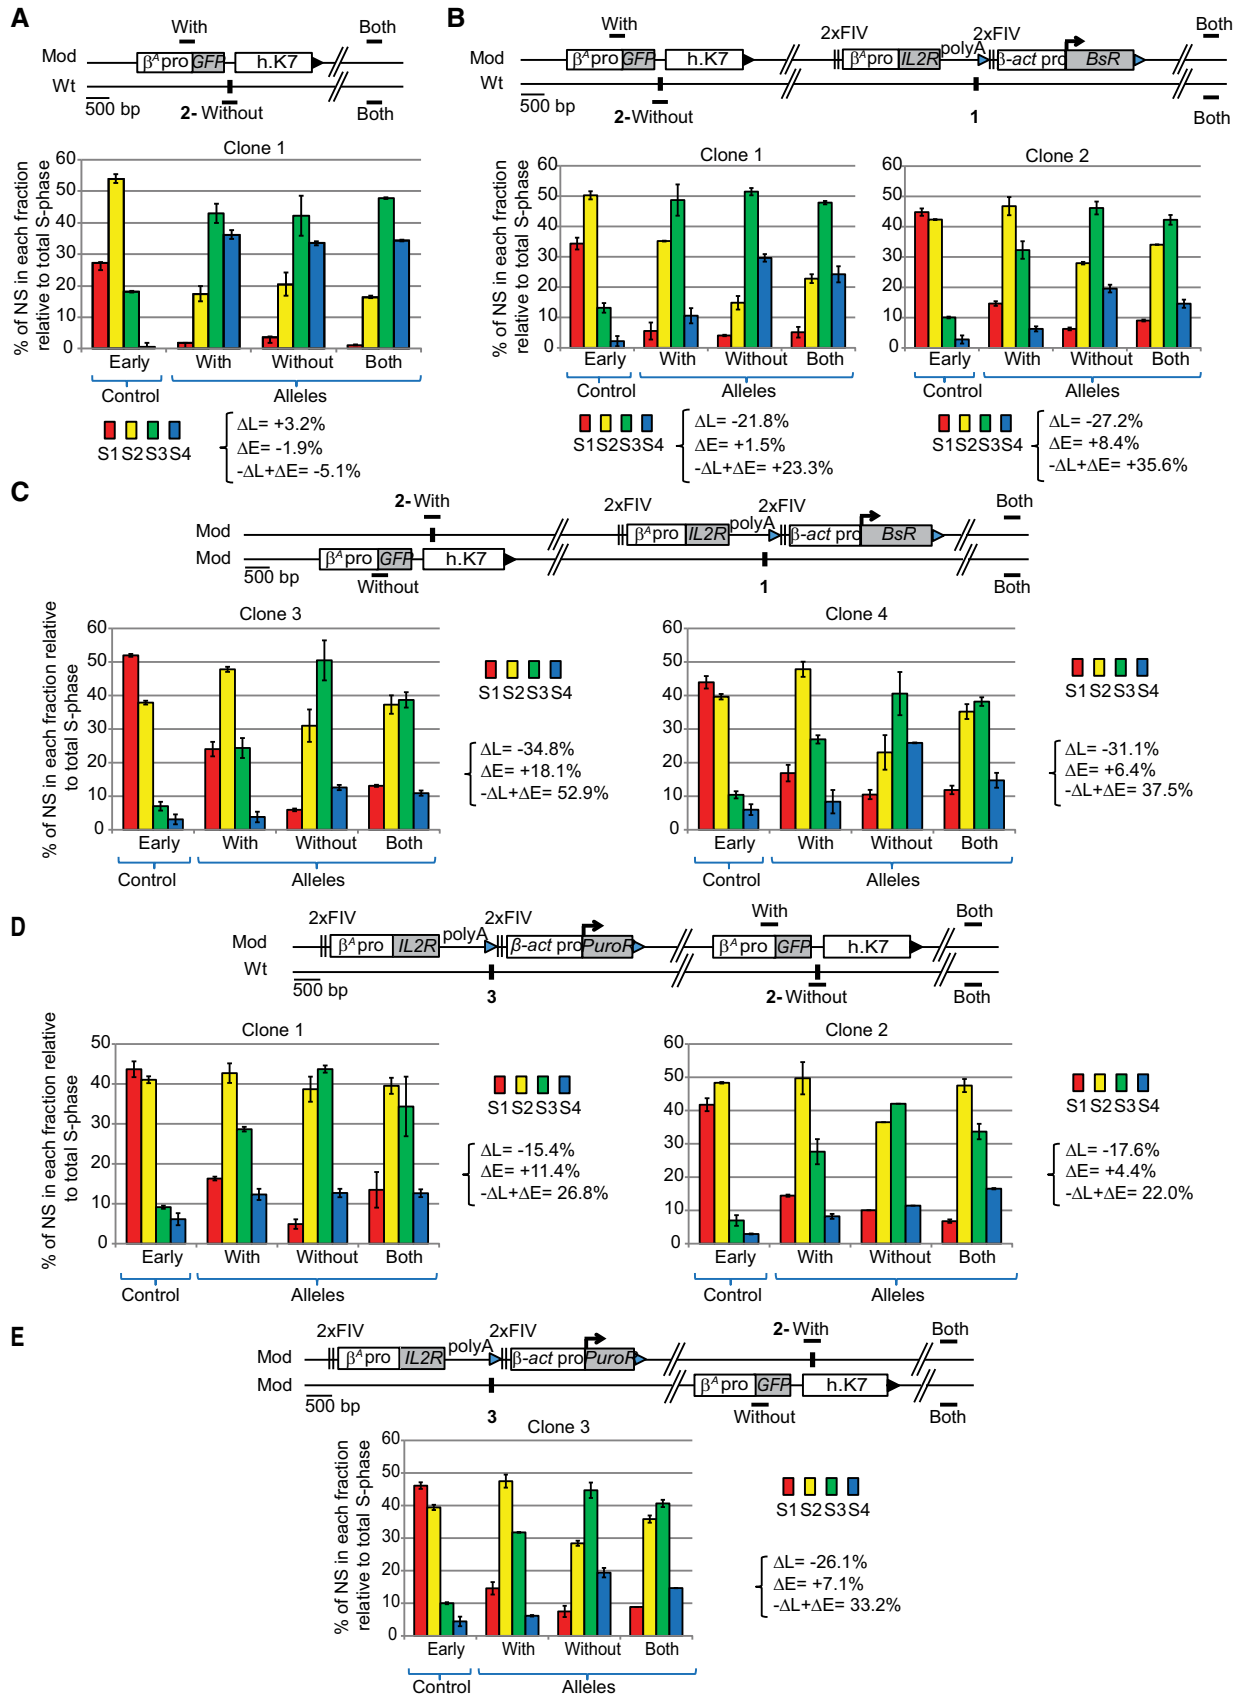

Figure EV2.

**Figure EV3. Two  $\beta^A$ -globin +  $\beta$ -actin constructs as well as two  $\beta$ -actin constructs inserted at sites 1 and 3 form an early-replicated domain.**

A–C RT profiles of each chromosomal allele are determined after targeted transgene integration using the allele-specific analysis of RT method by real-time PCR quantification described in Appendix Fig S1. Differences in  $-\Delta L + \Delta E$  values calculated at the target site following transgene integration are indicated. Error bars correspond to the standard deviation for qPCR duplicates. (A, B) Analysis of two 1 + 2 + 3 (A) and three 1 + 3 (B) clonal cell lines described in Fig 3A. (C) Analysis of five clonal cell lines containing two  $\beta$ -actin constructs inserted at sites 1 and 3 on the same chromosome described in Fig 3B. Blue and black triangles represent reactive *loxP* sites and recombined inactive *loxP* sites, respectively. Black vertical bars represent insertion sites. Error bars correspond to the standard deviation for qPCR duplicates.

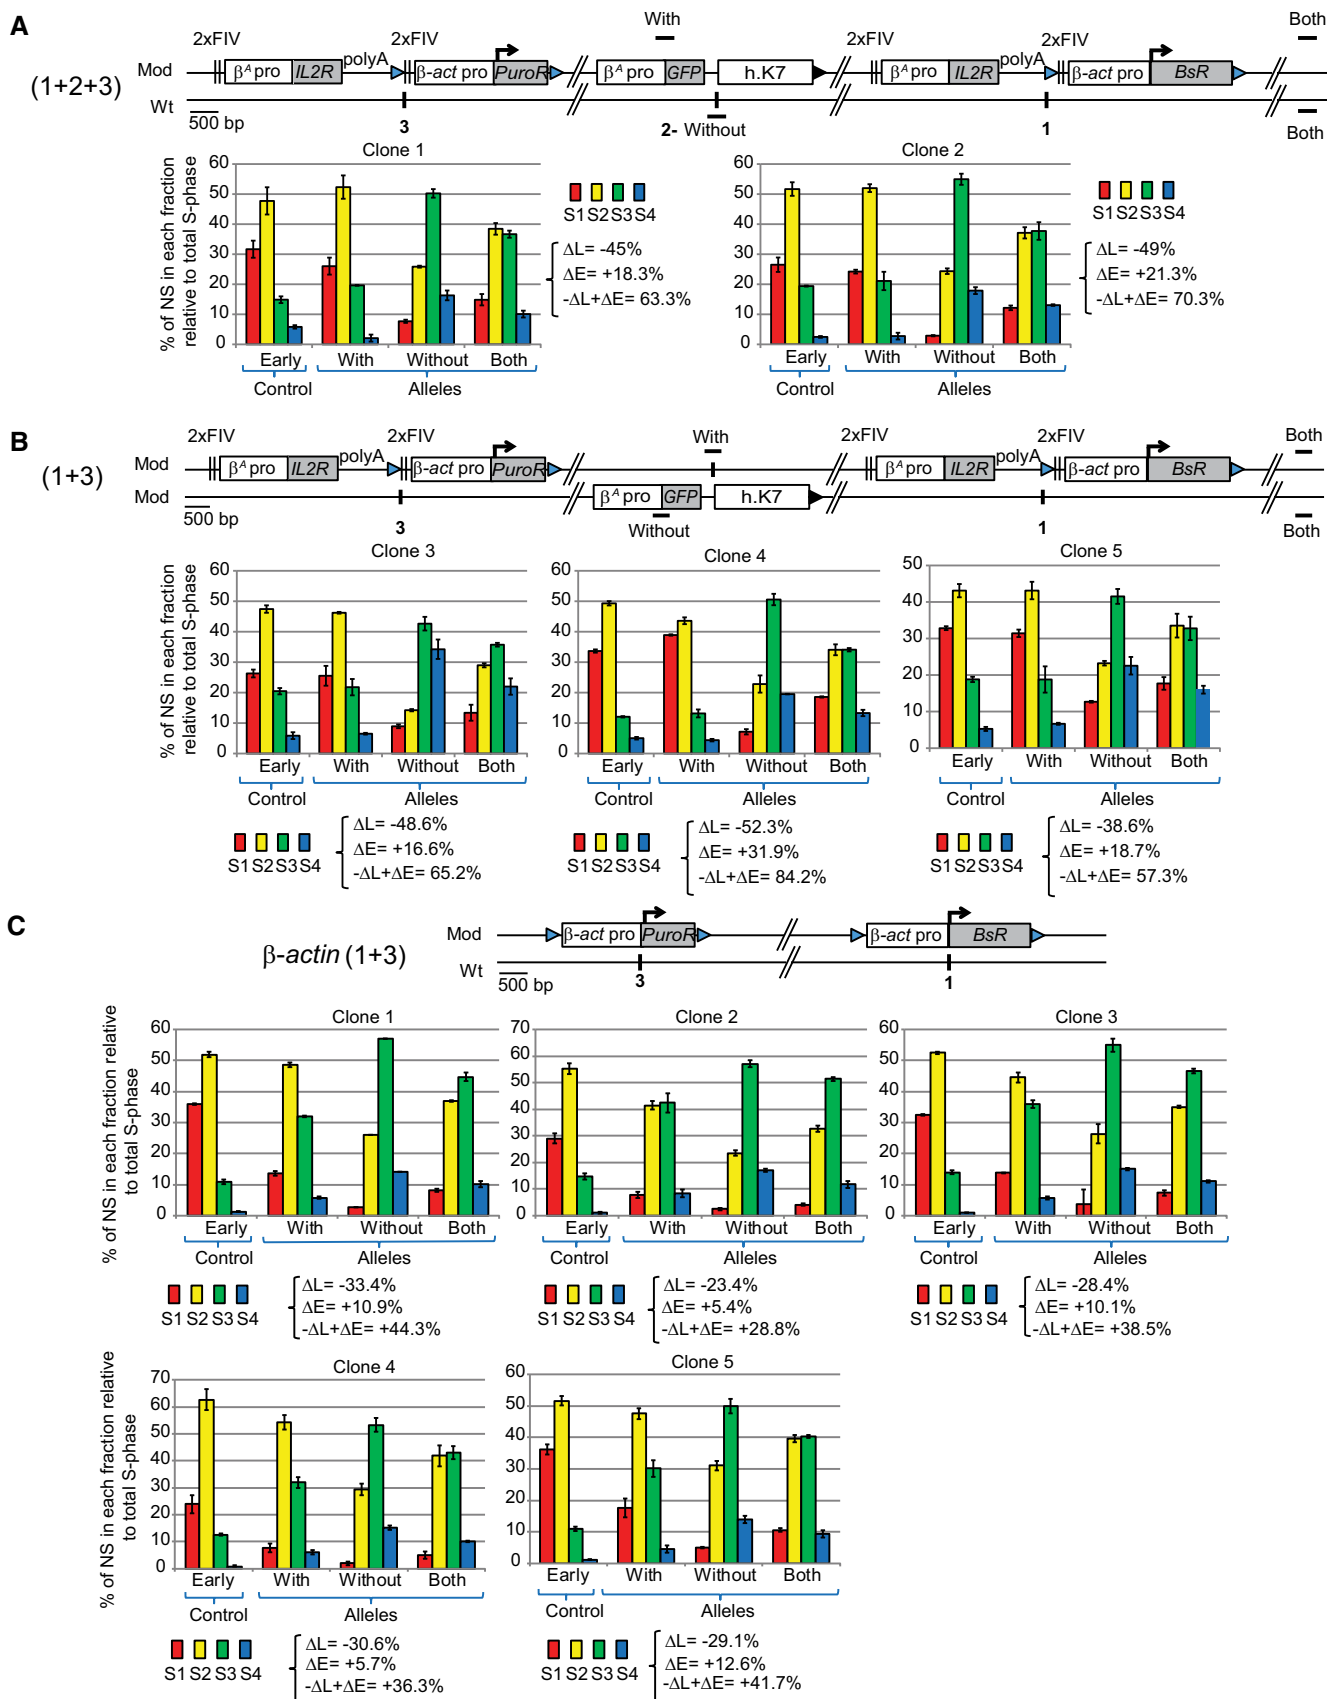

Figure EV3.

**Figure EV4. The open chromatin structure of the whole advanced replicon is imposed by the active  $\beta$ -actin promoter.**

- A Relative quantification, by real-time qPCR, of mRNA expression levels (RT-QPCR+) or background levels (RT-QPCR–), was performed in the  $\beta^A$ -globin and  $\beta^A$ -globin +  $\beta$ -actin clonal cell lines. For relative quantification, mRNA levels were normalized against *BU1A* mRNA levels arbitrarily set at 100 (first table). Crossing point (Cp) values for RT-QPCR+ and RT-QPCR– experiments are reported in the second table. NA corresponds to nonamplified samples, NS to nonspecific signals, and LD to the limit of detection.
- B–D The  $\beta^A$ -globin (B),  $\beta$ -actin (C), and  $\beta^A$ -globin +  $\beta$ -actin (D) transgenes are shown on the left, with the positions of the amplicons used for quantification (thick black lines with names indicated above). The endogenous active *MED14* promoter and two genomic regions located within the condensed region upstream from the  $\beta$ -globin locus (cond1 and cond2) were analyzed as controls. Quantification, by real-time qPCR, of total chromatin (input) extracted from the  $\beta^A$ -globin (B),  $\beta$ -actin (C), and  $\beta^A$ -globin +  $\beta$ -actin (D) clonal cell lines after digestion with increasing concentrations of micrococcal nuclease (MNAse, 2.5 U, 10 U, 40 U, 160 U/ml). Error bars indicate the standard deviation for qPCR triplicates made on two independent clones.
- E Immunoprecipitations of H3K9K27 acetylation (ac), H3K4 trimethylation (me3), or H3K4 dimethylation (me2) on formaldehyde-cross-linked chromatin extracted from the  $\beta^A$ -globin (green) and  $\beta^A$ -globin+ $\beta$ -actin (purple) clonal cell lines. The endogenous active *BU1A* promoter (*BU1A pro*) was analyzed as a control. Data are presented as enrichments of immunoprecipitated material relative to input DNA and normalized against *BU1A* enrichment. Error bars indicate the standard deviation for at least qPCR duplicates made on two independent clones.

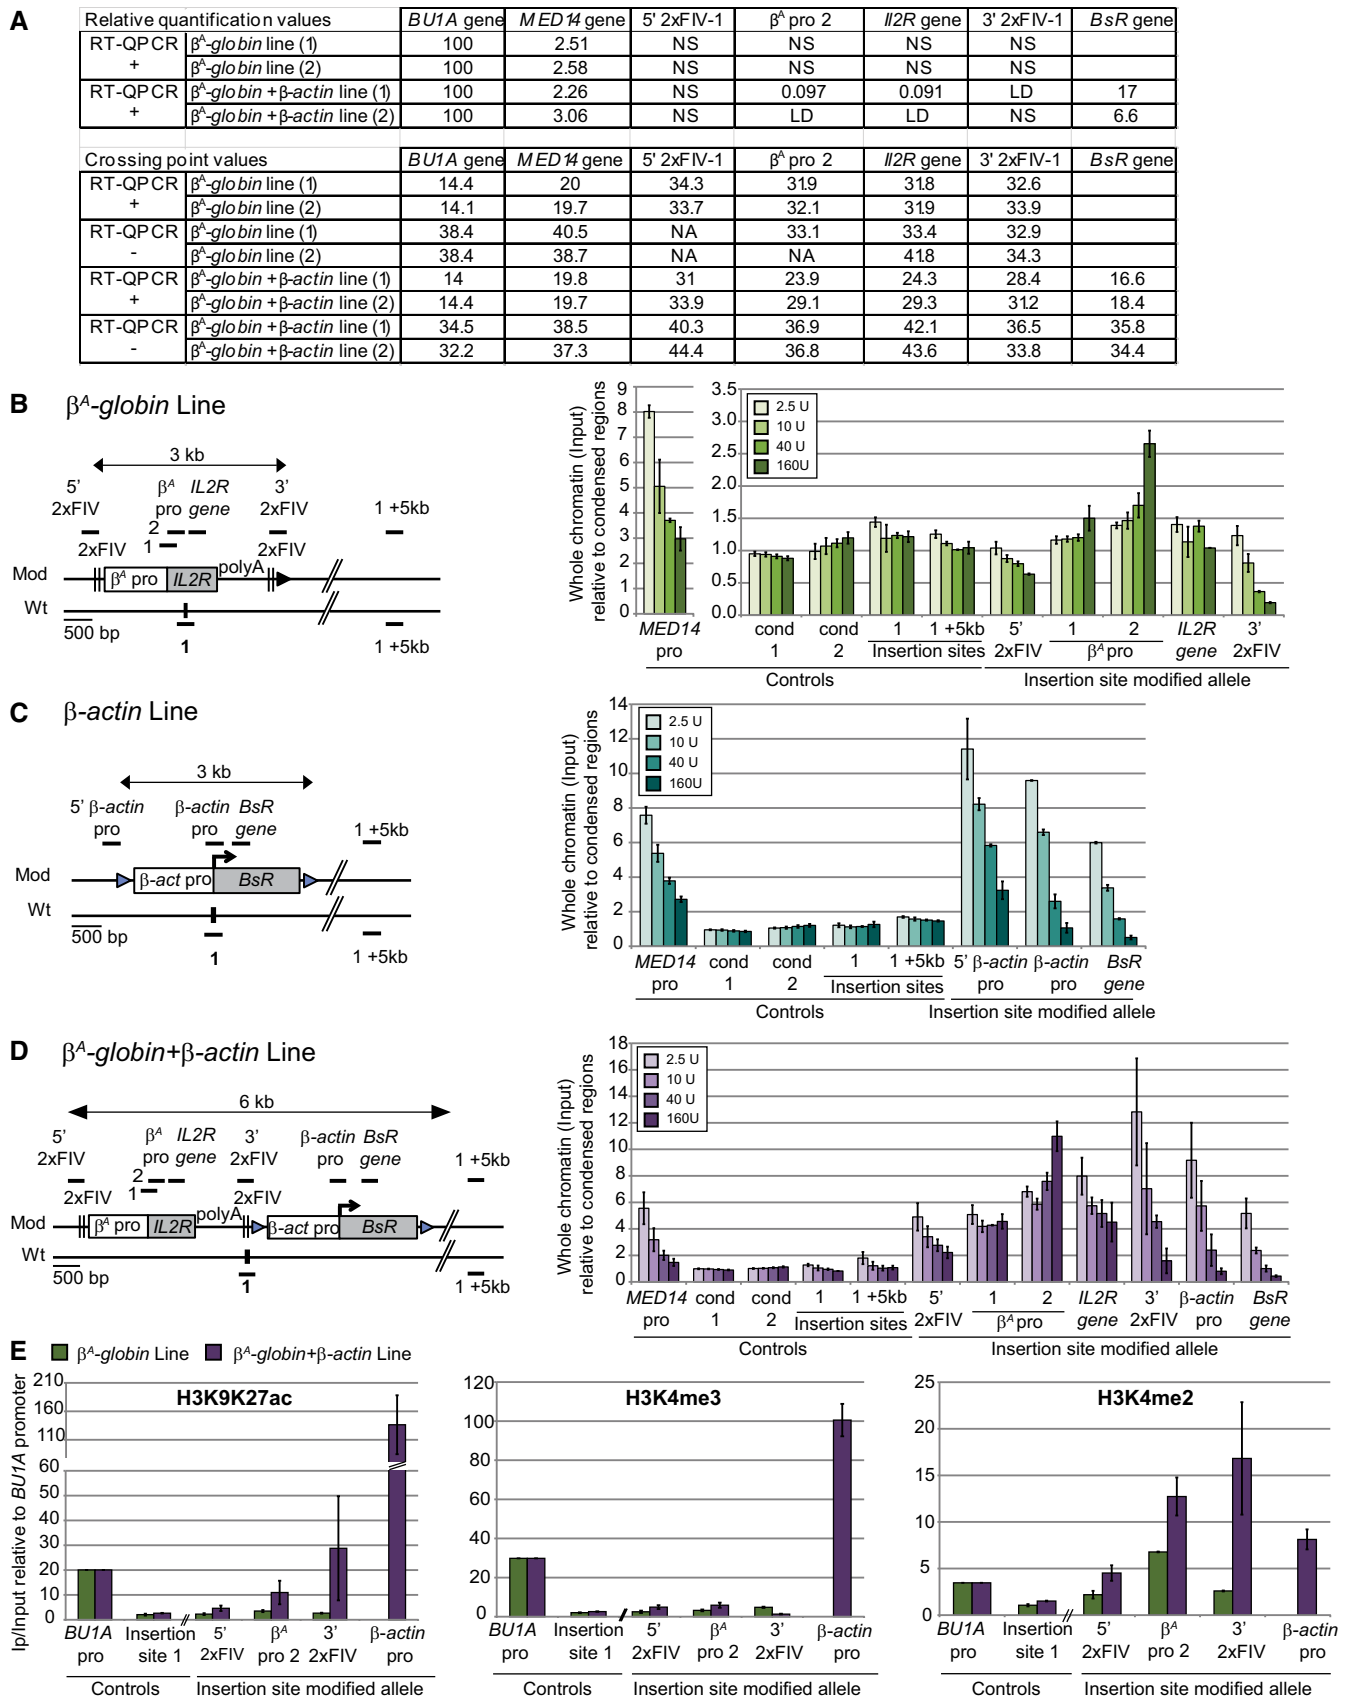

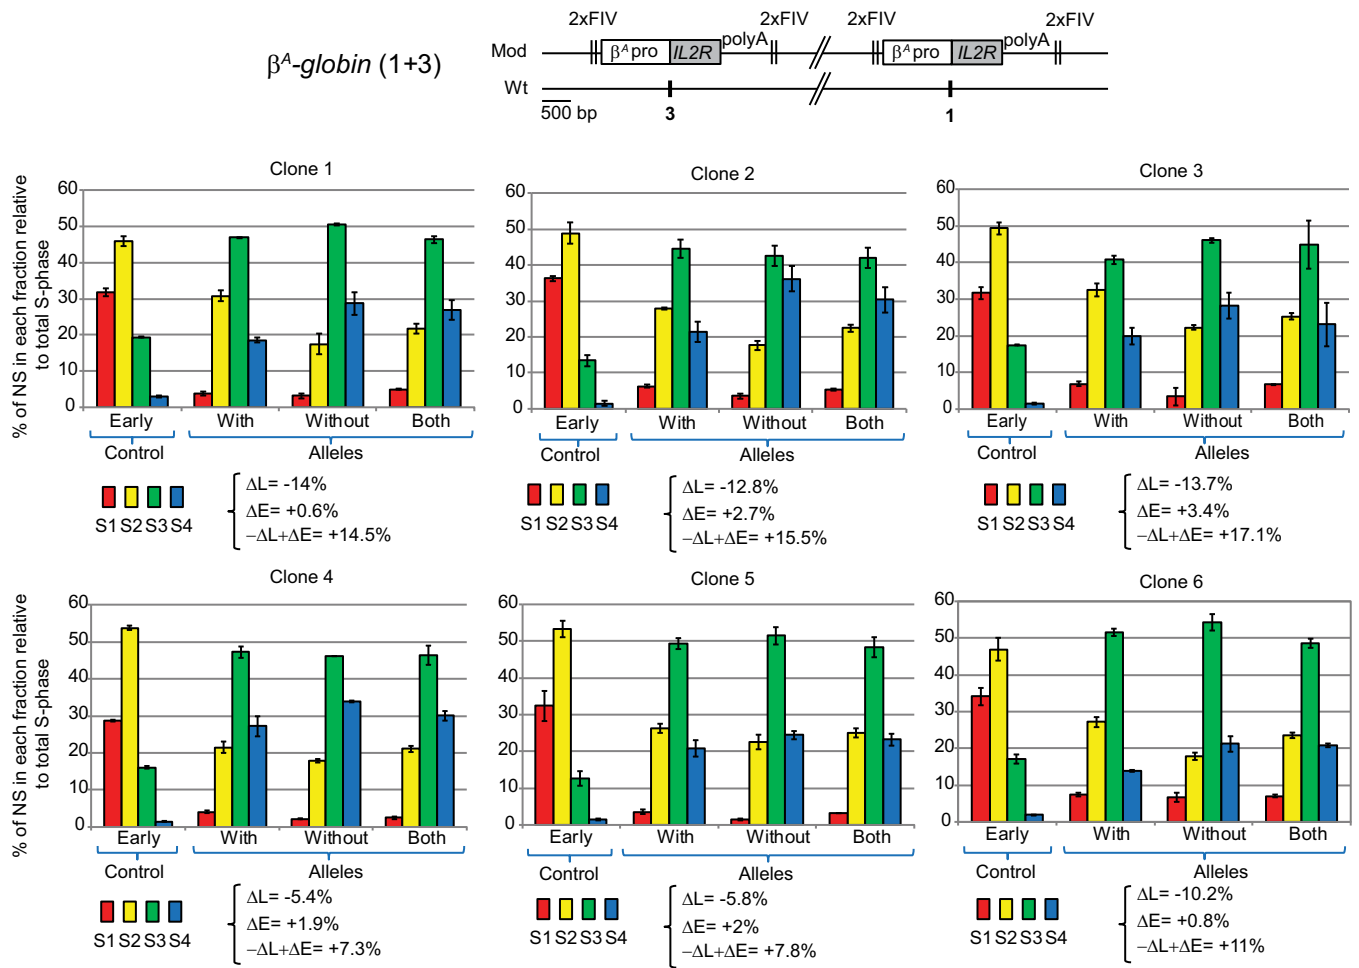

**Figure EV5. Two  $\beta^A$ -globin constructs inserted at sites 1 and 3 are not sufficient to form an early-replicated domain.**

RT profiles of each chromosomal allele are determined after targeted transgene integration using the allele-specific analysis of RT method by real-time PCR quantification described in Appendix Fig S1. Differences in  $-\Delta L + \Delta E$  values calculated at the target site following transgene integration are indicated. Error bars correspond to the standard deviation for qPCR duplicates. Analysis of six  $\beta^A$ -globin (1 + 3) clonal cell lines described in Fig 4B.
